1 **Verification of the phenylpropanoid pinoresinol biosynthetic pathway and its glycosides in**  
2 ***Phomopsis* sp. XP-8 using <sup>13</sup>C stable isotope labeling and liquid chromatography coupled with**  
3 **time-of-flight mass spectrometry**

4 Yan Zhang<sup>1,2</sup>, Junling Shi<sup>1\*</sup>, Yongqing Ni<sup>2</sup>, Yanlin Liu<sup>3</sup>, Zhixia Zhao<sup>2</sup>, Qianqian Zhao<sup>1</sup>,  
5 Zhenhong Gao<sup>1</sup>

6 <sup>1</sup>Key Laboratory for Space Bioscience and Biotechnology, School of Life Sciences, Northwestern  
7 Polytechnical University, 127 Youyi West Road, Xi'an, Shaanxi Province 710072, China.

8 <sup>2</sup>College of Food, Shihezi University, Road Beisi, Shihezi Xinjiang Province 832003, China.

9 <sup>3</sup>College of Enology, Northwest A & F University, Yangling Shaanxi Province 712100, China.

10 \*Corresponding author. Tel. +86-29-88460541; Fax. +86-29-88460541; E-mail:  
11 sjlshi2004@nwpu.edu.cn

12 **Abstract**

13 *Phomopsis* sp. XP-8, an endophytic fungus from the bark of Tu-Chung (*Eucommia*  
14 *ulmoides* Oliv), revealed the pinoresinol diglucoside (PDG) biosynthetic pathway after precursor  
15 feeding measurements and genomic annotation. To verify the pathway more accurately, [<sup>13</sup>C<sub>6</sub>]-labeled  
16 glucose and [<sup>13</sup>C<sub>6</sub>]-labeled phenylalanine were separately fed to the strain as sole substrates and  
17 [<sup>13</sup>C<sub>6</sub>]-labeled products were detected by ultra-high performance liquid chromatography-quantitative  
18 time of flight mass spectrometry. As results, [<sup>13</sup>C<sub>6</sub>]-labeled phenylalanine was found as  
19 [<sup>13</sup>C<sub>6</sub>]-cinnamylic acid and *p*-coumaric acid, and [<sup>13</sup>C<sub>12</sub>]-labeled pinoresinol revealed that the  
20 pinoresinol benzene ring came from phenylalanine via the phenylpropane pathway. [<sup>13</sup>C<sub>6</sub>]-Labeled  
21 cinnamylic acid and *p*-coumaric acid, [<sup>13</sup>C<sub>12</sub>]-labeled pinoresinol, [<sup>13</sup>C<sub>18</sub>]-labeled pinoresinol  
22 monoglucoside (PMG), and [<sup>13</sup>C<sub>18</sub>]-labeled PDG products were found when [<sup>13</sup>C<sub>6</sub>]-labeled glucose  
23 was used, demonstrating that the benzene ring and glucoside of PDG originated from glucose. It was  
24 also determined that PMG was not the direct precursor of PDG in the biosynthetic pathway. The study  
25 verified the occurrence of the plant-like phenylalanine and lignan biosynthetic pathway in fungi.

26 **Keywords:** [<sup>13</sup>C<sub>6</sub>]-labeled glucose, [<sup>13</sup>C<sub>6</sub>]-labeled phenylalanine, Q-TOF-MS,  
27 phenylalanine biosynthetic pathway, lignan

28  
29 **Importance:** Verify the phenylpropanoid-pinoresinol biosynthetic pathway and its glycosides in an  
30 endophytic fungi.

## 31 Introduction

32 Pinoresinol diglucoside (PDG), (+)-1-pinoresinol 4, 4' -di-O-  $\beta$  -D-glucopyranoside, is a major  
33 antihypertensive compound found in Tu-Chung, a traditional herb medicine with excellent efficacy for  
34 lowering blood pressure (1, 2). PDG possesses the potential to prevent osteoporosis (3). PDG is  
35 converted to enterolignans by intestinal microflora (4); thus, showing potential to reduce the risk of  
36 breast cancer (5) and other estrogen-dependent cancers (6).

37 PDG is found primarily in plants as lignans (1,7) but yields are very low. *Phomopsis* sp. XP-8 is  
38 an endophytic fungus isolated from the bark of Tu-Chung that was previously found to produce PDG  
39 *in vitro* (8); thus, providing an alternative resource to obtain PDG. This is the first report on the  
40 capability of a microorganism to synthesize lignan. However, production was also very low. Therefore,  
41 it is essential to identify the PDG biosynthetic pathway in this strain.

42 The lignan biosynthetic pathway has only been reported in plants until now (9,10). Synthesis of  
43 pinoresinol (Pin) in plants occurs via oxidative coupling of monolignols, which are synthesized through  
44 the phenylpropanoid pathway with phenylalanine (Phe), cinnamic acid, *p*-coumarate, *p*-coumaroyl-CoA,  
45 caffeate, ferulate, feruloyl-CoA, coniferylaldehyde, and coniferyl alcohol as intermediates or precursors  
46 (11, 12) (Fig.1). Pinoresinol monoglucoside (PMG) and PDG are converted from Pin by  
47 UDP-glucose-dependent glucosyltransferase (13). However, the biosynthesis of PDG from Pin has not  
48 been detected in plants and the Pin, PMG, and PDG biosynthetic pathways have not been illustrated in  
49 microorganisms.

50 We previously reported that *Phomopsis* sp. XP-8 converts mung bean starch and polysaccharides  
51 to Pin, PMG, and PDG. Phe, cinnamic acid, and *p*-coumaric acid have been detected as products of the  
52 bioconversion (14,15). Precursor feeding and enzymatic activity measurements indicate that this strain  
53 synthesizes PDG via many steps, such as during mass flow of the phenylpropanoid pathway (16).  
54 Genomic annotation indicates that the phenylpropane pathway exists in this strain (17) and some other  
55 microorganisms (18). However, the functions of the denoted genes have not been verified until now.  
56 Therefore, it is necessary to verify the entire PDG biosynthetic pathway in *Phomopsis* sp. XP-8.

57 Using stable or radioactive isotope-labeled compounds is an efficient and reliable strategy to  
58 verify the mass flow of unknown biosynthetic pathways by tracing the isotope-labeled compounds  
59 from substrates to products (19).  $^{13}\text{C}$ -labeled substrates have been used to shed light on the  
60 biodegradation pathways of organic pollutants (20). Isotope labeling combined with high-resolution

61 mass spectrometry have also been used to track the abiotic transformation of pollutants in aqueous  
62 mixtures (21). In recent years, liquid chromatography-mass spectrometry (LC-MS) and ultra-high  
63 performance liquid chromatography (UPLC) systems have been developed to facilitate the analysis of  
64 many substances at the same time with high sensitivity and selectivity (22). Stable isotope-labeled  
65 compounds have also been employed in several areas of biomedical research (23). The combination of  
66 stable isotope-labeling techniques with MS has allowed rapid acquisition and interpretation of data and  
67 has been used in many fields, including distribution, metabolism, food, and excretion studies (24, 25,  
68 26). The biochemical pathway of the aromatic compounds in tea has been also been revealed using the  
69 stable isotope labeling method (27).

70 In this study, we applied stable isotopes and MS to trace the PDG biosynthetic pathway.  $^{13}\text{C}_6$   
71 stable isotope-labeled glucose and  $^{13}\text{C}_6$  Phe were used as the substrates and electrospray  
72 ionization-quantitative time of flight tandem mass spectrometry (ESI-Q-TOF-MS/MS) was used to  
73 identify the products.

## 74 **Materials and methods**

### 75 **Microorganism and chemicals**

76 *Phomopsis* sp. XP-8 previously isolated from the bark of Tu-Chung and stored at the China Center  
77 for Type Culture Collection (Wuhan, China) (code: *Phomopsis* sp. CCTCC M 209291) was used in the  
78 study.

79 Phe (purity  $\geq$  98%, Sigma, St. Louis, MO, USA), cinnamic acid and *p*-coumaric acid (purity  $\geq$   
80 98%; Aladdin, Shanghai, China), PDG, PMG, and Pin (purity  $\geq$  99%; National Institutes for Food and  
81 Drug Control, Beijing, China) were used as the standards (dissolved in methanol) for the structural  
82 analysis and product identification. [ $^{13}\text{C}_6$ ]-Labeled phenylalanine and glucose were purchased from the  
83 Qingdao TrachinoidCo ( $\geq$ 99%; Qingdao, China). The purity of the [ $^{13}\text{C}_6$ ]-labeled Phe and glucose was  
84 99%. Methanol (HPLC grade) was purchased from Fisher Scientific (Fairlawn, NJ, USA). The water  
85 used in the experiment was purified using a Milli-Q water purification system (18.5 M) (Millipore  
86 Corp., Bedford, MA, USA). Other reagents and chemicals were of analytical grade.

### 87 **Preparation of *Phomopsis* sp. XP-8 cells**

88 *Phomopsis* sp. XP-8 was grown at 28°C on potato dextrose agar plates for 5 days. Then, three  
89 pieces of mycelia (5 mm in diameter) were inoculated into 100 mL liquid potato dextrose broth in a  
90 250-mL flask and cultivated at 28°C on a rotary shaker (180 rpm). After 4 days, the cells were collected

91 by centrifugation at 4°C (1,136×g for 10 min) using a centrifuge (HC-3018R, Anhui USTC Zonkia  
92 Scientific Instruments Co., Ltd., Anhui, China). The cells were washed twice with sterile water and  
93 used for bioconversion according to the experimental design.

#### 94 **Bioconversion systems**

95 The bioconversion with normal glucose as the sole substrate was carried out in a 250-mL flask  
96 containing 100 mL of ultrapure water (pH 7), 15 g/L glucose, and the prepared *Phomopsis* sp. XP-8 cell  
97 set a ratio of 10 g cells (wet weight) per 100 mL medium. To track the mass flow from glucose to PDG,  
98 15 g/L glucose was changed to 5 g/L [<sup>13</sup>C<sub>6</sub>]-labeled glucose (5 g/L) in the above medium and the same  
99 conditions were used for bioconversion.

100 Bioconversion with Phe as the sole substrate was carried out in medium containing 0.15 g/L  
101 glucose (used for the glycosyl donors), 7 mM [<sup>13</sup>C<sub>6</sub>]-labeled phenylalanine, and the prepared  
102 *Phomopsis* sp. XP-8 cells at a ratio of 10 g wet cells per 100 mL medium.

103 All bioconversions were carried out for 48 h at 28°C and 180 rpm. At the end of bioconversion,  
104 the broth was collected and filtered through an intermediate speed qualitative filter paper before the  
105 products were detected.

#### 106 **Identification of the accumulated products during bioconversion**

107 The products were extracted from the vacuum-evaporated (0.09 MPa, 50°C) bioconversion broth  
108 with methanol and adjusted to 4 mL for the UPLC measurements after filtration through a membrane  
109 (0.45 μm, 13 mm diameter; Millipore, Billerica, MA, USA). The UPLC analysis was performed on a  
110 Waters Acquity UPLC system (Waters Corp., Milford, MA, USA), equipped with a binary pump, a  
111 thermostatically controlled column compartment, and a UV detector. Gradient elution was performed  
112 on an Acquity UPLC™ BEH C18 column (50 mm × 2.1 mm I.D., 1.7 μm; Waters) and the column  
113 temperature was maintained at 30°C, while sample temperature was 10°C (15).

114 The MS analysis of the products was carried out on a Q-TOF Premier™ with an ESI source  
115 (Waters Corp.) at the optimized parameters of: capillary voltage, 2.8 kV; sampling cone voltage, 20 V;  
116 extractor voltage, 4 V; source temperature, 100°C; desolvation temperature, 250°C, and flow rate of the  
117 desolvation gas (N<sub>2</sub>), 400 L/h. The collision cell parameters for the Q-TOF-MS/MS analysis were:  
118 collision gas (Argon) flow rate, 0.45 L/h; collision energy, 15–35 eV. The mass spectra were recorded  
119 using full scan mode over a mass range of m/z 100–800 in negative ion mode. The MS acquisition rate  
120 was set to 1.0 s, with a 0.02 s inter-scan delay. The Q-TOF-MS/MS experiments were carried out by

121 setting the quadrupole to allow ions of interest to pass prior to fragmentation in the collision cell.

122 Accurate mass measurements were obtained by means of a lock mass that introduces a low flow  
123 rate (3 L/min) of a chrysophanol (253.0499) calibrating solution in the ESI-Q-TOF-MS and  
124 ESI-Q-TOF-MS/MS. All operations and acquisition and data analyses were controlled by Masslynx  
125 V4.1 software (Waters Corp.).

## 126 **Data processing**

127 Peak detection, alignment, and identification of the detected compounds were performed using  
128 Masslynx V4.1 software (Waters Corp.). The MS/MS fragmentation patterns were used for informative  
129 non-targeted metabolic profiling of the LC-MS data, and the acquired LC-MS/MS spectrum was  
130 identified after comparison with spectra proposed by the Mass bank database ([www.massbank.jp](http://www.massbank.jp)), the  
131 KEGG database, and related reports.

132

## 133 **Results**

### 134 **Detection of products converted from normal glucose**

135 Production of PDG, monoglucoside (PMG), Pin, Phe, *p*-coumaric acid (*p*-Co), and cinnamic acid  
136 (Ca) were detected in bioconversion systems using glucose as the sole substrate. Data in Figs. 2–7  
137 show the mass spectra of these compounds accumulated in the bioconversion systems and the  
138 corresponding standards.

139 Production of Phe was detected at a molecular weight and major daughter ions of  $m/z = 164.08$   
140 and  $m/z = 147.06$ , respectively (Fig. 2D), which was consistent with the data obtained from the  
141 corresponding standards (Fig. 2B). Similarly, production of PDG, PMG, Pin, *p*-Co, and CA was also  
142 detected in the bioconversion system, indicating that glucose was converted to these products by  
143 *Phomopsis* sp. XP-8, as only glucose was provided in the bioconversion system.

### 144 **Identification of products converted from [<sup>13</sup>C<sub>6</sub>]-labeled phenylalanine**

145 The phenylpropane pathway in plants starts with Phe and ends with *p*-Co. The same mass flow  
146 was previously detected during production of PDG from glucose by *Phomopsis* sp. XP-8 (Zhang et al.,  
147 2015b). To verify this finding and the role of the Phe pathway in the biosynthesis of PDG, PMG, and  
148 Pin, [<sup>13</sup>C<sub>6</sub>]-labeled Phe was used as the sole substrate in the bioconversion system with 5 g/L glucose

149 (mainly used as the glucoside donor). As results,  $^{13}\text{C}$  labeled Pin, Phe, *p*-Co, and Ca were successfully  
150 detected (Fig. 8).

151 The retention time (RT) of [ $^{13}\text{C}_6$ ]-labeled Phe was the same as the Phe standard (Figs.2A and 8A).  
152 The molecular weight and major daughter ions of [ $^{13}\text{C}_6$ ]-labeled Phe were obtained at  $m/z = 170.09$   
153 (Fig. 8A), indicating six  $^{13}\text{C}$  in Phe. Similarly, the other products were also successfully detected at the  
154 same RT of their corresponding normal standard substrates. All  $^{13}\text{C}$ -labeled product data and their  
155 corresponding standard substrates are summarized in Table 1.

156 Standard Ca ( $\text{C}_9\text{H}_8\text{O}_2$ ) was detected at a RT of 17.94 min with molecular weight and major  
157 daughter ions obtained at  $m/z = 147.05$  and  $m/z = 103.06$ , respectively. (Fig. 3A,B).  $^{13}\text{C}$ -Labeled Ca  
158 was detected in the bioconversion system at a molecular weight of  $m/z=153.07$ , indicating that six  $^{13}\text{C}$   
159 were introduced into Ca (Fig. 8B). The major daughter ions of  $^{13}\text{C}$ -labeled Ca were obtained at  $m/z$   
160  $=109.08$ , indicating six  $^{13}\text{C}$  referring to the standard Ca ( $m/z=103.06$ ). The structure of  $^{13}\text{C}$ -labeled Ca  
161 with out-COOH was the major daughter ion at  $m/z=103.06$ . Therefore, it was deduced that the six  $^{13}\text{C}$   
162 were in a benzene ring not in -COOH.

163 According to the mass spectra of the *p*-Co standard ( $\text{C}_9\text{H}_8\text{O}_3$ , RT= 5.75min, the molecular weight  
164 and major daughter ions were obtained at  $m/z = 163.05$  and  $m/z = 119.06$  respectively) (Fig. 4A, B).  
165 *p*-Co produced in the conversion system was detected at a molecular weight of  $m/z= 169.05$  and  
166 revealed six  $^{13}\text{C}$  by consulting the *p*-Co standard ( $m/z= 163.05$ ). The major daughter ions of  
167  $^{13}\text{C}$ -labeled *p*-Co were obtained at  $m/z =125.07$ , which was six more than that of the *p*-Co standard  
168 ( $m/z=119.06$ ). The structure of  $^{13}\text{C}$ -labeled *p*-Co without-COOH was detected at the major daughter  
169 ion of  $m/z=119.06$ . Therefore, it was deduced that the six  $^{13}\text{C}$  might be distributed in the benzene ring.

170  $^{13}\text{C}$ -Labeled Pin was detected (Fig. 8D-1) and compared with the mass spectra of the Pin standard  
171 ( $\text{C}_{20}\text{H}_{22}\text{O}_6$ , RT= 9.736 min, the molecular weight and major daughter ions were obtained at  $m/z =$   
172  $357.13$  and  $m/z = 151.04$  respectively) (Fig. 8D-2). The molecular weight of  $^{13}\text{C}$ -labeled Pin was  
173 identified at  $m/z= 369.05$ , which was 12 more than that of standard Pin ( $m/z= 357.13$ ). The major  
174 daughter ions of  $^{13}\text{C}$ -labeled Pin were obtained at  $m/z =125.07$ , indicating six more than that of the Pin  
175 standard ( $m/z=151.04$ ). The structure of  $^{13}\text{C}$ -labeled Pin with loss of a benzene ring was identified as  
176 the major daughter ion of  $m/z=151.04$  (Fig. 7D-1). This result confirmed that the six  $^{13}\text{C}$  were  
177 distributed in a benzene ring, whereas the other six  $^{13}\text{C}$  might be in a symmetrical benzene ring.  
178 Therefore, we deduced that the Pin with 12  $^{13}\text{C}$  was bio-converted from the [ $^{13}\text{C}_6$ ]-labeled Phe, Ca,

179 or/and *p*-Co. This finding also confirmed that the benzene ring in Pin came from Phe, which is  
180 consistent with that of the lignan biosynthetic pathway in plants.

### 181 **Identification of products converted from [<sup>13</sup>C<sub>6</sub>]-labeled glucose**

182 To explore where Phe originated from the Pin biosynthetic pathway, [<sup>13</sup>C<sub>6</sub>]-labeled glucose was  
183 supplied as the sole substrate in the bioconversion system with *Phomopsis* sp. XP-8 cells. As results,  
184 <sup>13</sup>C labeled PDG, PMG, Pin, Phe, *p*-Co, and Ca were detected (Fig. 8).The products were detected  
185 according to the RTs of the corresponding standards. The detailed information on the products and  
186 corresponding standards is shown in Table 2.

187 According to the mass spectra of the Phe (C<sub>9</sub>H<sub>11</sub>NO<sub>2</sub>) standard with a RT of 2.06 min, <sup>13</sup>C labeled  
188 Phe was detected in the conversion system with [<sup>13</sup>C<sub>6</sub>]-labeled glucose as the sole substrate at a  
189 molecular weight of *m/z*=168.06, 169.06, 170.07, 171.07, 172.07, and 173.08 (Fig. 9A), indicating four,  
190 five, six, seven, eight, and nine <sup>13</sup>C in <sup>13</sup>C-labeled Phe, respectively. This result illustrates that there  
191 were four, five, six, seven, eight, and nine carbons in the Phe from glucose. The major daughter ions at  
192 *m/z* = 151.04, 107.05, and 108.06 detected in <sup>13</sup>C-labeled Phe showed that there were four, five, and six  
193 <sup>13</sup>C in Phe, respectively, compared to the daughter ions of the Phe standard (*m/z*= 147.06, *m/z* =  
194 103.06). Phe without <sup>13</sup>C was not detected, indicating that all detected Phe was converted from glucose  
195 via the shikimic acid pathway according to KEGG pathway database. The possible positions of <sup>13</sup>C in  
196 Phe are summarized in Table 2.

197 Referring to the mass spectra of the Ca standard (C<sub>9</sub>H<sub>8</sub>O<sub>2</sub>, RT= 17.94 min, molecular weight of  
198 *m/z* = 147.05, major daughter ion of *m/z* = 103.06) (Fig. 3A, B), <sup>13</sup>C-labeled Ca was detected in the  
199 bioconversion system with <sup>13</sup>C<sub>6</sub>-labeled glucose as the sole substrate (Fig. 9B). <sup>13</sup>C-Labeled Ca was  
200 detected at *m/z*=147.06, 149.08, 152.09, 153.09, and 154.05, corresponding to zero, two, four, five, and  
201 six <sup>13</sup>C in the detected molecules, respectively, indicating that they were converted from [<sup>13</sup>C<sub>6</sub>]-labeled  
202 glucose. The major daughter ions of <sup>13</sup>C-labeled Ca were obtained at *m/z* =108.05, indicating five <sup>13</sup>C in  
203 the molecule compared with that of normal Ca (*m/z*=103.06).Notably, Ca without <sup>13</sup>C was also detected  
204 in the bioconversion system, showing that Ca could also be produced from substrates other than  
205 glucose. This was more complex than using Phe as the substrate. The possible positions of <sup>13</sup>C in Ca  
206 are summarized in Table 2.

207 According to the mass spectra of the *p*-Co standard (C<sub>9</sub>H<sub>8</sub>O<sub>3</sub>, RT= 5.75min, molecular weight of



208  $m/z = 163.05$ , and major daughter ion of  $m/z = 119.06$ ) (Fig. 4A,B),  $^{13}\text{C}_6$ -labeled *p*-Co was detected in  
209 the bioconversion system at  $m/z=163.05, 168.06, 169.06, 170.07, 171.07, \text{ and } 172.08$  (Fig. 9C).  
210 Compared to the molecular weight of the *p*-Co standard ( $m/z= 163.05$ ), the detected  $^{13}\text{C}$ -labeled *p*-Co  
211 indicated that zero, five, six, seven, eight, and nine carbons in *p*-Co came from  $^{13}\text{C}$ -labeled glucose.  
212 The *p*-Co with, five, six, seven, eight, and nine  $^{13}\text{C}$  may have been converted from [ $^{13}\text{C}_6$ ]-labeled glucose.  
213 The major daughter ion of  $^{13}\text{C}$ -labeled-Co was detected at  $m/z = 119.05$ , which was the same as that of  
214 the normal *p*-Co standard ( $m/z=119.08$ ). Normal *p*-Co was also detected in the bioconversion system,  
215 indicating that *p*-Co could also be formed from substrates other than glucose. The possible positions of  
216  $^{13}\text{C}$  in *p*-Co are summarized in Table 2.

217 According to the mass spectra of standard PDG ( $\text{C}_{32}\text{H}_{42}\text{O}_{16}$ , RT= 5.868 min, molecular weight of  
218  $m/z = 681.26$  and major daughter ion of  $m/z = 519.19$ ) (Fig. 5A,B),  $^{13}\text{C}$ -labeled PDG was detected at  
219  $m/z=695.54, 698.19, 699.27, 700.27, 701.29, 703.25, 704.23, 705.26, 706.25, \text{ and } 707.26$  (Fig. 9D),  
220 indicating the occurrence of 14, 17, 18, 19, 20, 21, 22, 23, 24, 25, and 26  $^{13}\text{C}$  in PDG, respectively.  
221 Glucose may be the sole glycosyl donor in the biosynthesis of PDG by *Phomopsis* sp. XP-8 (Zhang et  
222 al. 2015a, b), so there should be more than 12  $^{13}\text{C}$  in PDG. As expected, more than 14  $^{13}\text{C}$  were  
223 detected in  $^{13}\text{C}$ -labeled PDG. Therefore, it was confirmed that glucose was the sole glycosyl donor for  
224 PDG biosynthesis. The maximum number of  $^{13}\text{C}$  was detected in PDG. If the two glycosides of PDG  
225 were all  $^{13}\text{C}$ , the other 14  $^{13}\text{C}$  would from the C-skeleton of the Pin structure; if all C-skeletons of the  
226 Pin structure were formed of  $^{13}\text{C}$ , there would be only one  $^{13}\text{C}$ -labeled glycoside in PDG. Therefore,  
227 glucose not only provided glycoside groups to PDG, but also provided the core Pin structure. The  
228 possible positions of  $^{13}\text{C}$  in PDG are summarized in Table 2.

229 According to the mass spectra of the PMG standard ( $\text{C}_{26}\text{H}_{32}\text{O}_{11}$ , RT= 7.597 min, molecular weight  
230 of  $m/z = 519.20$ , and major daughter ion of  $m/z = 357.13$ ) (Fig. 6A,B),  $^{13}\text{C}$ -labeled PMG was detected at  
231 a molecular weight of  $m/z=520.29, 521.26, 522.27, 523.29, 524.29, 526.29, 527.28, 528.28, 529.32,$   
232  $530.31, 531.29, 533.21, 535.27, 537.33, 538.29, 541.31, \text{ and } 543.32$  (Fig. 9E), corresponding to 1, 2, 3,  
233 4, 5, 7, 8, 9, 10, 11, 12, 14, 16, 18, 19, 22, and 26  $^{13}\text{C}$  in PMG, respectively, compared with that of PMG  
234 ( $m/z=519.20$ ). One glycoside is present in the structural formula of PMG. If the glycoside came from  
235 glucose, there should be at least six  $^{13}\text{C}$  in PMG. The occurrence of a molecule with less than six  $^{13}\text{C}$   
236 PMG indicates that the PMG glycoside could have been converted from another substrate, instead of  
237 the added [ $^{13}\text{C}_6$ ]-labeled glucose. However, the detection of 26  $^{13}\text{C}$  in PMG illustrates that the PMG

238 glucoside could also be converted from [ $^{13}\text{C}_6$ ]-labeled glucose. The major daughter ions of  $^{13}\text{C}$ -labeled  
239 PMG were detected at  $m/z = 151.04$ ,  $m/z = 357.28$ ,  $359.23$ ,  $361.16$ ,  $362.30$ ,  $364.30$ ,  $365.28$ ,  $366.28$ ,  
240  $367.31$ ,  $368.29$ ,  $370.25$ ,  $374.32$ , and  $376.30$ (Fig. 9E-2), indicating 0, 2, 4, 5, 7, 8, 9, 10, 11, 13, 17, and  
241  $^{19}\text{C}$  in PMG, respectively, after a comparison to the PMG standard ( $m/z = 357.13$ ). The major  
242 daughter ion of PMG ( $m/z = 357.13$ ) indicated the molecular weight of the core structure of PMG  
243 without the glycoside (20 C). This finding indicates that the core structure of PMG may have partly  
244 originated from [ $^{13}\text{C}_6$ ]-labeled glucose. The possible positions of  $^{13}\text{C}$  in PMG are summarized in Table  
245 2.

246 According to the mass spectra of the Pin standard ( $\text{C}_{20}\text{H}_{22}\text{O}_6$ ,  $\text{RT} = 9.736$  min, molecular weight of  
247  $m/z = 381.1$  and major daughter ion of  $m/z = 341.1$ )(Fig. 7A,B),  $^{13}\text{C}$ -labeled Pin was detected at  
248  $m/z = 390.2$ ,  $391.2$ ,  $392.2$ ,  $393.2$ ,  $394.2$ ,  $396.2$ , and  $397.2$ (Fig. 9F), indicating 9, 10, 11, 12, 13, 15, and  
249  $^{16}\text{C}$  in the detected Pin, respectively, compared with the Pin standard ( $m/z = 381.1$ ). There are 20 C in  
250 the molecular formula of Pin ( $\text{C}_{20}\text{H}_{22}\text{O}_6$ ). The maximum of  $^{16}\text{C}$  was detected in the formed Pin,  
251 indicating the [ $^{13}\text{C}_6$ ]-labeled glucose partly contributed to the formation of Pin. The major daughter  
252 ions of  $^{13}\text{C}$ -labeled Pin were detected at  $m/z = 346.2$ ,  $347.2$ ,  $349.2$ ,  $350.2$ , and  $356.2$  (Fig. 9F-2),  
253 indicating 5, 6, 8, 10, and 15  $^{13}\text{C}$  in the detected Pin, respectively, compared with the Pin standard  
254 ( $m/z = 341.1$ ). This finding illustrates that the core Pin structure was partly converted  
255 from [ $^{13}\text{C}_6$ ]-labeled glucose. The possible positions of  $^{13}\text{C}$  in Pin are summarized in Table 2.

256 Taken together, the possible biosynthetic pathways for PDG, PMG, and Pin are summarized in Fig.  
257 10. The mass flow from [ $^{13}\text{C}_6$ ]-Phe to [ $^{13}\text{C}_6$ ]-Ca, [ $^{13}\text{C}_6$ ]-*p*-Co, and [ $^{13}\text{C}_{12}$ ]-Pin was verified by the  
258 experiments using [ $^{13}\text{C}_6$ ]-labeled Phe as the sole substrate. The mass flow from [ $^{13}\text{C}_6$ ]-glucose  
259 to [ $^{13}\text{C}_6$ ]-Phe, [ $^{13}\text{C}_6$ ]-Ca, [ $^{13}\text{C}_6$ ]-*p*-Co, [ $^{13}\text{C}_{12}$ ]-Pin, [ $^{13}\text{C}_{18}$ ]-PMG, and [ $^{13}\text{C}_{24}$ ]-PDG was verified by the  
260 data obtained using [ $^{13}\text{C}_6$ ]-glucose as the sole substrate (Fig. 10A).

## 261 Possible pathways for biosynthesis of PDG and PMG

262 Two structures of PMG were detected: one was [ $^{13}\text{C}_{12}$ ]-PMG with two benzene rings converted  
263 from  $^{13}\text{C}$ -labeled glucose and a normal glycoside (M,  $m/z 531.29$ ), and the other was [ $^{13}\text{C}_{18}$ ]-PMG with  
264 both benzene ring structures converted and a glucoside from  $^{13}\text{C}$ -labeled glucose (M1,  $m/z 537.33$ ).  
265 Similarly, two PDG structures were detected: one was [ $^{13}\text{C}_{18}$ ]-PDG with a two benzene ring structure  
266 and one glycoside converted from  $^{13}\text{C}$ -labeled glucose (D1,  $m/z 699.27$ ); the other one was [ $^{13}\text{C}_{24}$ ]-

267 PDG with two benzene rings and two glycosides from  $^{13}\text{C}$ -labeled glucose (D2, m/z 705.26).

268 If PMG was the direct precursor of PDG, M would be converted to D1 by bonding one  
269 [ $^{13}\text{C}_6$ ]-labeled glycoside through glycosylation; M1 could be converted to D1 by bonding one normal  
270 glycoside through glycosylation and to D2 by bonding one [ $^{13}\text{C}_6$ ]-labeled glycoside. If this is true, D1  
271 would have two glucoside sources, whereas D2 would have only one glucoside source. Therefore, the  
272 concentration of D2 should be lower than D1. However, the data show that the relative abundance of  
273 D2 (m/z=705) was much higher than that of D1 (m/z=699). Therefore, PMG was not the precursor of  
274 PDG.

275 In contrast, if PDG was the direct precursor of PMG, D1 would be converted to M by  
276 hydrolyzation of one [ $^{13}\text{C}_6$ ]-labeled glycoside and to M1 by hydrolyzation of one normal glycoside; D2  
277 would be converted to M1 by hydrolyzation of one [ $^{13}\text{C}_6$ ]-labeled glycoside. If this is true, M1 would  
278 have two glycoside sources, where as M would have only one source. The concentration of M should  
279 be lower than M1. However, the data show that relative abundance of M (m/z = 531.29) was higher  
280 than that of M1 (m/z=699). Therefore, PDG was not the precursor of PMG.

281

## 282 **Discussion**

283 The  $^{13}\text{C}$  stable isotope labeling method was successfully used in this study to verify the  
284 phenylpropanoid-pinoresinol and biosynthetic pathway its glycosides in *Phomopsis* sp. XP-8 during  
285 mass flow. It was very important to verify the occurrence of this pathway in microorganisms for the  
286 first time. Stable-assisted metabolomics are an efficient way to trace and identify bio-transformed  
287 products and the metabolic pathways involved in their formation, such as understanding the fate of  
288 organic pollutants in environmental samples (19). This is the first time that this method has been used  
289 to verify the occurrence of phenylpropanoids in a microorganism. Compared with previous studies  
290 using precursor feeding, detection of enzyme activity, and genomic annotation, this is the first time this  
291 pathway has been illustrated by credible visual evidence. More importantly, it is the first time that  
292 differences between the PDG and PMG biosynthetic pathways have been verified.

293 The results obtained in this study verify the existence of the phenylpropanoid-lignan metabolic  
294 pathway in *Phomopsis* sp. XP-8. Genomic annotation is an efficient way to discover the pathways that  
295 are normally difficult to reveal by metabolic and enzymatic evidence due to low intermediate  
296 accumulation, low end-product production, and silent gene expression under normal conditions. This

297 method has been successfully used to identify the existence of a phenylpropanoid metabolic pathway in  
298 *Aspergillus oryzae* (28), and the molecular genetics of naringenin biosynthesis, a typical plant  
299 secondary metabolite in *Streptomyces clavuligerus*(29), and the occurrence of the  
300 phenylpropanoid-lignan pathway in *Phomopsis* sp. XP-8 (17). However, further evidence is still needed  
301 to verify gene functions and identify the key metabolites. This study reports the existence of  
302 thephenylpropanoid-lignan pathway *Phomopsis* sp. XP-8during mass flow and identified the  
303 metabolites. Further studies are still needed to verify the gene functions.

304 Additional studies should illustrate the origin of the genes in the phenylpropanoid-lignan pathway  
305 of *Phomopsis* sp. XP-8. Horizontal gene transfer (HGT) has long been recognized as an important force  
306 in the evolution of organisms (30). HGT occurs among different bacteria and plays important roles in  
307 the adaptation of microorganisms to different hosts or environmental conditions (31). More and more  
308 evidence for gene transfer between distantly related eukaryotic groups has been presented  
309 (30).Therefore, we cannot exclude the possibility that XP-8 may have acquired the genes related to the  
310 lignan biosynthetic pathway from its host plant by HGT during long-term symbiosis and evolution.  
311 However, further evidence is still needed to verify this proposed process.

312 The results obtained in this study provide useful information on the biosynthesis of lignans and  
313 their glycosides via microbial fermentation. Biosynthesis of lignans is of great interest to organic  
314 chemists as it provides a model for biomimetic chemistry and has extensive applications  
315 (32).Improvement shave been made in the techniques to biosynthesize lignan products by regulating  
316 the lignan biosynthetic pathway in trees through genetic modifications (33).However, the lignan  
317 biosynthetic pathway has rarely been reported. More importantly, the bioconversion sequence from Pin  
318 to PDG and the direct precursor of PDG have remained unclear until now. In previous studies on  
319 *Phomopsis* sp. XP-8, the highest production of PDG and PMG did not occur simultaneously (14) and  
320 PMG was not the precursor of PDG because PDG production decreased and/or disappeared when PMG  
321 yield increased (15). The present study demonstrated that PMG was not the precursor of PDG, and  
322 PDG was not the precursor of PMG, indicating that Pin might be converted to PMG and PDG via two  
323 different pathways in *Phomopsis* sp. XP-8, which has not been revealed in plants.

324 Furthermore, this study revealed that the bioconversion of Pin, PMG, and PDG from glucose  
325 occurred simultaneously as that from Phe. We found that the benzene ring structure of Phe did not open  
326 throughout the entire Pin bioconversion process in *Phomopsis* sp. XP-8 when Phe was used as the sole

327 substrate, indicating that the Pin benzene ring originated from Phe. Glucose was converted to Phe and  
328 was the sole glycoside donor for PDG biosynthesis. Therefore, glucose not only participated in the  
329 formation of glycosides in PDG, but also provided the PDG benzene ring structure. This is different  
330 from that found in plants, indicating there might be some other different pathways to produce these  
331 products in *Phomopsis* sp. XP-8.

332 Not all intermediates in the KEGG-identified plant-lignan biosynthetic pathway related to Pin,  
333 PMG, and PDG formation were found in *Phomopsis* sp. XP-8, such as caffeic acid, ferulic acid, and  
334 coniferyl alcohol (Fig. 1). This may be because the pathways after *p*-Co are different in XP-8 from  
335 those in plants, or the accumulation of these intermediates was too less to be detected. Further studies  
336 are needed to verify this hypothesis.

### 337 **Conclusion**

338 In summary, the mass flow of the Pin, PMG, and PDG biosynthetic pathway in *Phomopsis* sp.  
339 XP-8 was verified as the following: starting from [ $^{13}\text{C}_6$ ]-Phe to [ $^{13}\text{C}_6$ ]-Ca, [ $^{13}\text{C}_6$ ]-*p*-Co, and [ $^{13}\text{C}_{12}$ ]-Pin  
340 when there was only Phe as the sole substrate; starting from [ $^{13}\text{C}_6$ ]-glucose to [ $^{13}\text{C}_6$ ]-Phe, [ $^{13}\text{C}_6$ ]-Ca,  
341 [ $^{13}\text{C}_6$ ]-*p*-Co, [ $^{13}\text{C}_{12}$ ]-Pin, [ $^{13}\text{C}_{18}$ ]-PMG, and [ $^{13}\text{C}_{24}$ ]-PDG when there was high level of glucose (15 g/L)  
342 as the sole substrate (Fig. 10A).

### 343 **Acknowledgements**

344 We acknowledge funding by the National Natural Science Foundation of China (grant no.  
345 31471718), the Modern Agricultural Industry Technology System (CARS-30), the National Key  
346 Technology R&D Program (2015BAD16B02), the National Natural Science Foundation of China  
347 (grant no. 31760446), and the Start-up funding of Shihezi University (RCSX201713), and Key research  
348 and development plan of Shaanxi Province (2017ZDXL-NY-0304).

349 **References**

- 350 1. Charles JS, Ravikumt PR, Huang FC. 1976. Isolation and synthesis of Pinosesinol diglucoside, a major  
351 antihypertensive principle of Tu-Chung (*Eucommia ulmoides* Oliv.). *J Am Chem Soc.* 98: 5412-5413.
- 352 2. Luo LF, Wu WH, Zhou YJ, Yan J, Yang GP, Ouyang DS. 2010. Antihypertensive effect of *Eucommia*  
353 *ulmoides* Oliv. extracts in spontaneously hypertensive rats. *J Ethnopharmac.* 129: 238-243.
- 354 3. Saleem M, Kim HJ, Ali MS, Lee YS (2005) An update on bioactive plant lignans. *Nat Prod Rep* 22:696-716
- 355 4. Xie LH, Akao T, Hamasaki K, Deyama T, Hattori M. 2003. Biotransformation of pinosresinol diglucoside to  
356 mammalian lignans by human intestinal microflora, and isolation of *Enterococcus faecalis* strain PDG-1  
357 responsible for the transformation of (+)-pinosresinol to (+)-lariciresinol. *Chem Pharm Bull.* 51: 508-515.
- 358 5. Xie J, Tworoger SS, Franke AA, Terry KL, Rice MS, Rosner BA, Willett WC, Hankinson SE, Eliassen AH  
359 (2013) Plasma enterolactone and breast cancer risk in the Nurses' Health Study II. *Breast Cancer Res Tr* 139:  
360 801-809
- 361 6. Adlercreutz H. 2002. Phyto-oestrogens and cancer. *Lancet Oncol.* 3: 364-373.
- 362 7. Luo LF, Wu WH, Zhou YJ, Yan J, Yang GP and Ouyang DS, Antihypertensive effect of *Eucommia ulmoides*  
363 Oliv. extracts in spontaneously hypertensive rats. *J Ethnopharmacol* 129:238–243 (2010).
- 364 8. Shi JL, Liu C, Liu LP, Yang BW, Zhang YZ. 2012. Structure identification and fermentation characteristics of  
365 Pinosesinol diglucoside produced by *Phomopsis* sp. isolated from *Eucommia ulmoides* Oliv. *Appl Microbiol*  
366 *Biotechnol.* 93: 1475-1483.
- 367 9. Satake H, Ono E, Murata J. 2013. Recent advances in the metabolic engineering of lignan biosynthesis  
368 pathways for the production of transgenic plant-based foods and supplements. *J Agric Food Chem.* 61:  
369 11721-11729.
- 370 10. Pastor V, Sanchez-Bel P, Gamir J, Pozo MJ, Flors V. 2018. Accurate and easy method for systemin  
371 quantification and examining metabolic changes under different endogenous levels. *PLANT METHODS.*  
372 14:33.
- 373 11. Eudes A, Liang Y, Mitra P, Loqué D. 2014. Lignin bioengineering. *Current Opinion in Biotechnology.* 28:  
374 189-198.
- 375 12. Zhou YH, Ma JH, Xie J, Deng LL, Yao SX, Zeng KF. 2018. Transcriptomic and biochemical analysis of  
376 highlighted induction of phenylpropanoid pathway metabolism of citrus fruit in response to salicylic acid,  
377 *Pichia membranaefaciens* and oligochitosan. *POSTHARVEST BIOLOGY AND TECHNOLOGY.* 142:  
378 81-92.
- 379 13. Satake H, Ono E, Murata J. 2013. Recent advances in the metabolic engineering of lignan biosynthesis  
380 pathways for the production of transgenic plant-based foods and supplements. *J Agric Food Chem.* 61:  
381 11721-11729.
- 382 14. Zhang Y, Shi JL, Gao ZH, Che JX, Shao DY, Liu YL. 2016. Comparison of pinosresinol diglucoside  
383 production by *Phomopsis* sp. XP-8 in different media and the characterization and product profiles of the  
384 cultivation in mung bean. *Journal of the Science of Food and Agriculture.* 96(12):4015~4025.
- 385 15. Zhang Y, Shi JL, Gao ZH, Yangwu RM, Jiang HS, Che JX, Liu YL. 2015. Production of pinosresinol  
386 diglucoside, pinosresinol monoglucoside, and pinosresinol by *Phomopsis* sp. XP-8 using mung bean and its  
387 major components. *Appl Microbiol Biotechnol* 99:4629–4643.
- 388 16. Zhang Y, Shi JL, Liu LP, Gao ZH, Che JX, Shao DY, Liu YL. 2015. Bioconversion of Pinosesinol  
389 Diglucoside and Pinosesinol from Substrates in the Phenylpropanoid Pathway by Resting Cells of *Phomopsis*  
390 sp. XP-8. *PLOS ONE* 10:e0137066.
- 391 17. Gao ZH, Zhang ZW, Xu XG, Che JX, Zhang Y, Liu YL, Shi JL. 2018. Genomic analysis reveals the  
392 biosynthesis pathways of diverse secondary metabolites and pinosresinol and its glycoside derivatives in

- 393 *Phomopsis* sp. XP-8. *Acta Microbiologica Sinica*. 58 (5): 939-954. DOI: 10.13343/j.cnki.wsxb.20170604.
- 394 18. Zhou J, Wang K, Xu S, Wu J, Liu P, Du G, Li J, Chen J. 2015. Identification of membrane proteins associated  
395 with phenylpropanoid tolerance and transport in *Escherichia coli* BL21. *Journal of Proteomics*. 113 :15-28.
- 396 19. Tian ZY, Vila JQ, Yu M, Bodnar W, Aitken MD. 2018. Tracing the Biotransformation of Polycyclic Aromatic  
397 Hydrocarbons in Contaminated Soil Using Stable Isotope-Assisted Metabolomics. *ENVIRONMENTAL*  
398 *SCIENCE & TECHNOLOGY LETTERS*. 5(2): 103-109.
- 399 20. Morasch B, Hunkeler D, Zopfi J, Temime B, Höhener P. 2011. Intrinsic biodegradation potential of aromatic  
400 hydrocarbons in an alluvial aquifer – potentials and limits of signature metabolite analysis and two stable  
401 isotope-based techniques. *Water Res*. 45: 4459–4469.
- 402 21. Fischer A, Manefield M, Bombach P. 2016. Application of stable isotope tools for evaluating natural and  
403 stimulated biodegradation of organic pollutants in field studies. *Curr. Opin. Biotechnol*. 41: 99–107.
- 404 22. Angel SI, David PG, Daniel CG, Juan Daniel SH, Maximo V, Jose Luis RC, Guillermo Q, Julia K. 2018.  
405 Model selection for within-batch effect correction in UPLC-MS metabolomics using quality control - Support  
406 vector regression. 1026:62-68.
- 407 23. Ren S, Patrick S, Ren H, Hoover AJ, Hesk D, Marques R, Mergelsberg I. 2018. <sup>34</sup>S: A New Opportunity for  
408 the Efficient Synthesis of Stable Isotope Labeled Compounds. *Chemistry (Weinheim an der Bergstrasse,*  
409 *Germany)*. 24(28):7133-7136.
- 410 24. Robey MT, Ye R, Bok JW, Clevenger KD, Islam MN, Chen C, Gupta R, Swyers M, Wu E, Gao P, Thomas  
411 PM, Wu CC, Keller NP, Kelleher NL. 2018. Identification of the First Diketomorpholine Biosynthetic  
412 Pathway Using FAC-MS Technology. *Acs Chemical Biology*. 13(5):1142-1147.
- 413 25. Li J, Liu H, Wang C, Yang J, Han G. 2018. Stable isotope labeling-assisted GC/MS/MS method for  
414 determination of methyleugenol in food samples. *Journal of the science of food and agriculture*. 98 (9) :  
415 3485-3491.
- 416 26. Mutlib AE. 2008. Application of stable isotope-labeled compounds in metabolism and in  
417 metabolism-mediated toxicity studies. *CHEMICAL RESEARCH IN TOXICOLOGY*. 21 (9): 1672-1689.
- 418 27. Zhou Y, Peng QY, Zeng LT, Tang JC, Li JL, Dong F, Yang ZY. 2018. Study of the biochemical formation  
419 pathway of aroma compound 1-phenylethanol in tea (*Camellia sinensis* (L.) O. Kuntze) flowers and other  
420 plants. *FOOD CHEMISTRY*. 258: 352-358.
- 421 28. Seshime Y, Juvvadi PR, Fujii I, Kitamoto K. 2005. Genomic evidences for the existence of a phenylpropanoid  
422 metabolic pathway in *Aspergillus oryzae*. *Biochemical and Biophysical Research Communications*. 337 (3):  
423 747-751.
- 424 29. Álvarez-Álvarez, Botas, Albillos, Rumbero, Liras. 2015. Molecular genetics of naringenin biosynthesis, a  
425 typical plant secondary metabolite produced by *Streptomyces clavuligerus*. *Microbial Cell Factories*.  
426 14(1):1-12.
- 427 30. Soucy SM, Huang JL, Gogarten JP. 2015. Horizontal gene transfer: building the web of life. *Nature Reviews*  
428 *Genetics*. 16(8): 472-482.
- 429 31. Li M, Zhao J, Tang NW, Sun H, Huang JL. 2018. Horizontal Gene Transfer From Bacteria and Plants to the  
430 Arbuscular Mycorrhizal Fungus *Rhizophagus irregularis*. *FRONTIERS IN PLANT SCIENCE*. 9:701.
- 431 32. Umezawa T. 2005. Biosynthesis of lignans, lignins, and norlignans. *Kagaku to Seibutsu*. 43:461–467.
- 432 33. Chiang VL. 2006. Monolignol biosynthesis and genetic engineering of lignin in trees, a review. *Environ*  
433 *Chem Lett*. 4:143–146.
- 434



435 **Figure Captions**

436 **Fig.1 Biosynthetic pathways leading to lignans in plants.**

437 **Fig.2 Total ion current chromatogram and mass spectrum of standard phenylalanine and that in**  
438 **the samples** (A and B show the total ion current chromatogram and the mass spectrum of standard  
439 phenylalanine, respectively; C and D show the total ion current chromatogram and the mass spectrum  
440 of phenylalanine in the samples, respectively. Ion reaction was set to  $m/z=164$ )

441 **Fig.3 Total ion current chromatogram and mass spectrum of standard cinnamic acid and that in**  
442 **the samples** (A and B show the total ion current chromatogram and the mass spectrum of standard  
443 cinnamic acid, respectively; C and D show the total ion current chromatogram and the mass spectrum  
444 of the samples, respectively. Ion reaction was set to  $m/z=147$ )

445 **Fig.4 Total ion current chromatogram and mass spectrum of standard *p*-coumaric acid and that**  
446 **in the samples** (A and B show the total ion current chromatogram and the mass spectrum of standard  
447 *p*-coumaric acid, respectively; D–F show the total ion current chromatogram, and mass spectrum of  
448 *p*-coumaric acid in the samples, respectively. Ion reaction was set to  $m/z=163$ )

449 **Fig.5 Total ion current chromatogram and mass spectrum of standard PDG and that extracted**  
450 **from samples.**(A–C are the total ion current chromatogram, precursor ions, and daughter ions of  
451 standard PDG, respectively; D–F are the total ion current chromatogram, precursor ions, and daughter  
452 ions of the samples, respectively).

453 **Fig.6 Total ion current chromatogram and mass spectrum of standard**  
454 **pinoresinol-4-O- $\beta$ -D-glucopyranoside and that in the samples** (A and B show the total ion  
455 current chromatogram and mass spectrum of standard pinoresinol-4-O- $\beta$ -D-glucopyranoside,  
456 respectively; D–F show the total ion current chromatogram and the mass spectrum  
457 of pinoresinol-4-O- $\beta$ -D-glucopyranoside in samples, respectively. Ion reaction was set to  $m/z=518.5–$   
458  $519.5$ )

459 **Fig.7 Total ion current chromatogram and mass spectrum of standard pinoresinol and that in the**  
460 **samples** (A–C show the total ion current chromatogram, precursor ions, and daughter ions of the  
461 pinoresinol standard, respectively; D–F show the total ion current chromatogram, precursor ions, and  
462 daughter ions of pinoresinol in the samples, respectively. Ion reaction was set to  $m/z=356.5–357.5$ )

463 **Fig.8 Mass spectrum of phenylalanine, cinnamic acid, *p*-coumaric acid, PDG, PMG, and Pin in**



464 **the resting cell system using phenylalanine with the  $^{13}\text{C}_6$  stable isotope labeled as the substrate (A:**  
465 phenylalanine; B: cinnamic acid; C: *p*-coumaric acid; D: Pin)

466 **Fig.9 Mass spectrum of phenylalanine, cinnamic acid, *p*-coumaric acid, PDG, PMG, and Pin in**  
467 **the resting cell system using glucose with the  $^{13}\text{C}_6$  stable isotope labeled as the substrate (A:**  
468 phenylalanine; B: cinnamic acid; C: *p*-coumaric acid; D: PDG; E: PMG and F: Pin)

469 **Fig.10 Evidence for a PDG and PMG bioconversion pathway in *Phomopsis* sp. XP-8.**

470 The abbreviations in the figure indicate PMG with normal glycoside (M), PMG with  $^{13}\text{C}_6$  labeled  
471 glycoside (M1), PDG with one  $^{13}\text{C}_6$  labeled glycoside (D1), PDG with two  $^{13}\text{C}_6$  labeled glycoside (D2).  
472  $^{13}\text{C}_6$  labeled glycoside (Red font glu), normal glycoside (Black font glu). ✓ means the pathway was  
473 confirmed and ✗ means the pathway does not exist in *Phomopsis* sp. XP-8.

474

**Table 1** Predicted products with [<sup>13</sup>C<sub>6</sub>]-labeled phenylalanine as the substrate.

| Retention time (min) | Product information                                   |                              |                                                                                      | Predicted isotopic product  |     | Structure (The possible position of the labeled <sup>13</sup> C were showed red)      |
|----------------------|-------------------------------------------------------|------------------------------|--------------------------------------------------------------------------------------|-----------------------------|-----|---------------------------------------------------------------------------------------|
|                      | Product molecular formula                             | Normal <sup>12</sup> C (m/z) | Structure                                                                            | Heavy <sup>13</sup> C (m/z) | Δ M |                                                                                       |
| 2.06                 | Phe<br>C <sub>9</sub> H <sub>11</sub> NO <sub>2</sub> | Major ion<br>164.08          | 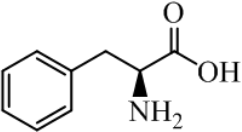   | 179.06                      | 6   |    |
|                      |                                                       | Daughter ion1<br>147.06      |   | 153.06                      | 6   |   |
|                      |                                                       | Daughter ion2<br>103.06      |  | 109.08                      | 6   |  |

|       |                                                              |                        |                                                                                     |        |   |                                                                                      |
|-------|--------------------------------------------------------------|------------------------|-------------------------------------------------------------------------------------|--------|---|--------------------------------------------------------------------------------------|
| 17.94 | Ca<br>C <sub>9</sub> H <sub>8</sub> O <sub>2</sub>           | Major ion<br>147.05    | 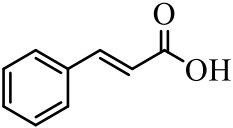  | 153.07 | 6 |   |
|       |                                                              | Daughter ion<br>103.06 |   | 109.08 | 6 |   |
| 5.75  | <i>p</i> -Co<br>C <sub>9</sub> H <sub>8</sub> O <sub>3</sub> | Major ion<br>163.05    |   | 169.05 | 6 |   |
|       |                                                              | Daughter ion<br>119.05 |  | 125.07 | 6 |  |

9.736

Pin  
 $C_{20}H_{22}O_6$

Major ion  
357.13

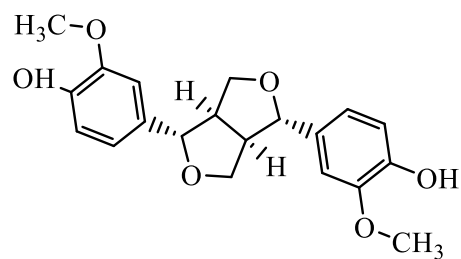

369.05 12

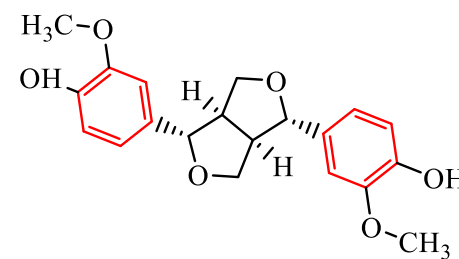

Daughter ion  
151.04

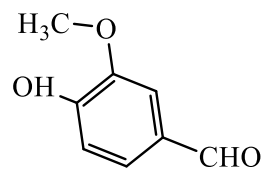

157.06 6

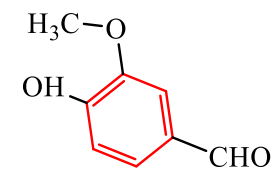

The abbreviations in the table mean phenylalanine (Phe), cinnamic acid (Ca), *p*-Coumaric acid (*p*-Co ), pinoselin (Pin).

**Table 2** Predicted products with [<sup>13</sup>C<sub>6</sub>]-labeled glucose as the substrate.

| Retention time (min) | Product molecular formula                             | Normal <sup>12</sup> C (m/z) | Structure                                                                         | Predicted isotopic product  |     | Structure (The possible position of the labeled <sup>13</sup> C were showed red)      |                                                                                       |
|----------------------|-------------------------------------------------------|------------------------------|-----------------------------------------------------------------------------------|-----------------------------|-----|---------------------------------------------------------------------------------------|---------------------------------------------------------------------------------------|
|                      |                                                       |                              |                                                                                   | Heavy <sup>13</sup> C (m/z) | Δ M |                                                                                       |                                                                                       |
| 2.06                 | Phe<br>C <sub>9</sub> H <sub>11</sub> NO <sub>2</sub> | Major ion<br>164.08          | 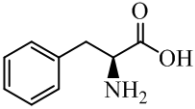 | 168.06                      | 4   |    |    |
|                      |                                                       |                              |                                                                                   | 169.06                      | 5   |   |   |
|                      |                                                       |                              |                                                                                   | 170.07                      | 6   |  |  |

|       |          |       |  |        |   |  |   |
|-------|----------|-------|--|--------|---|--|---|
|       |          |       |  | 171.07 | 7 |  |   |
|       |          |       |  | 172.07 | 8 |  |   |
|       |          |       |  | 173.08 | 9 |  |   |
|       | Daughter |       |  |        |   |  |   |
|       | ion 1    |       |  | 151.04 | 4 |  |   |
|       | 103.06   |       |  |        |   |  |   |
|       | Daughter |       |  |        |   |  |   |
|       | ion 2    |       |  | 107.05 | 4 |  |   |
|       | 147.06   |       |  | 108.06 | 5 |  |   |
| 17.94 | Ca       | Major |  | 147.06 | 0 |  | - |

|      |                        |              |  |        |   |  |   |  |
|------|------------------------|--------------|--|--------|---|--|---|--|
|      | $C_9H_8O_2$            | ion          |  | 149.08 | 2 |  |   |  |
|      |                        |              |  | 147.05 |   |  |   |  |
|      |                        |              |  | 152.09 | 4 |  |   |  |
|      |                        |              |  | 153.09 | 5 |  |   |  |
|      |                        |              |  | 154.05 | 6 |  |   |  |
|      |                        | Daughter     |  |        |   |  |   |  |
|      |                        | ion          |  | 108.05 | 5 |  |   |  |
|      |                        |              |  | 103.06 |   |  |   |  |
| 5.75 | $p$ -Co<br>$C_9H_8O_3$ | Major<br>ion |  | 163.05 | 0 |  | - |  |
|      |                        |              |  | 168.06 | 5 |  |   |  |

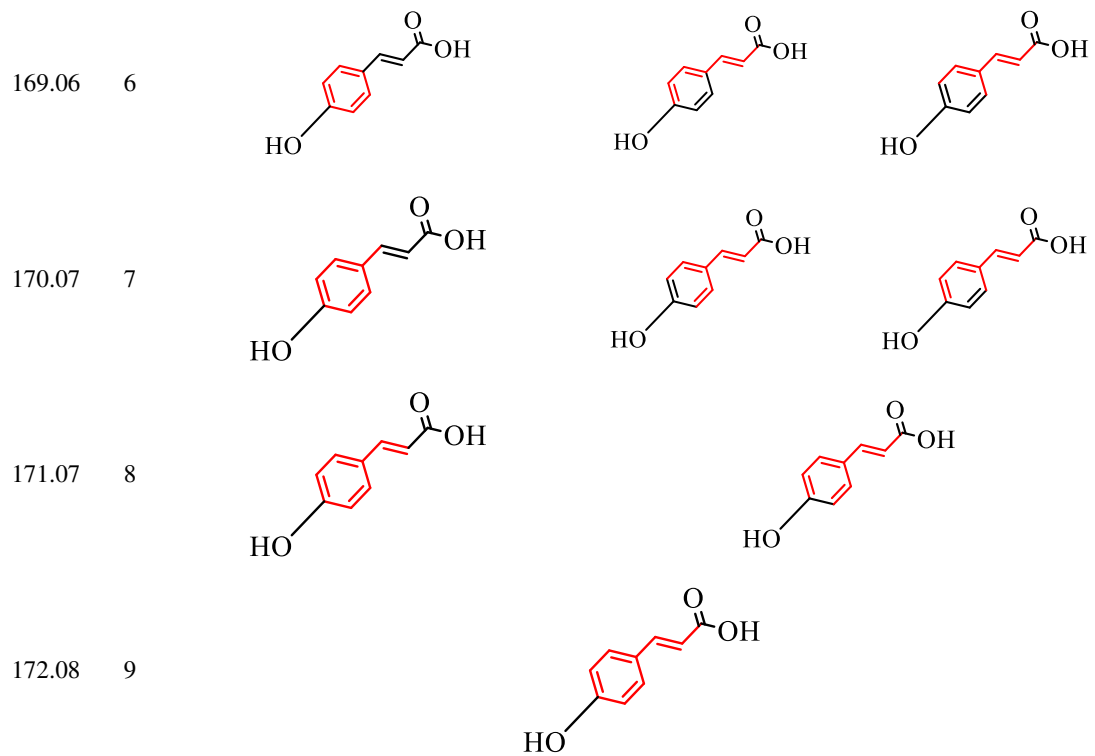

Daughter

ion

119.05

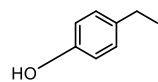

119.08 0

-



5.868

PDG  
 $C_{32}H_{42}O_{16}$

Major  
ion  
681.26

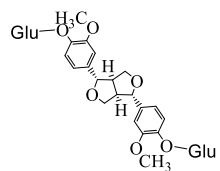

695.54 14

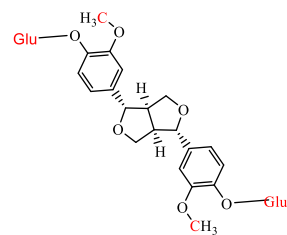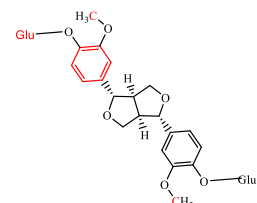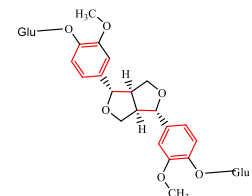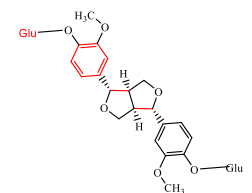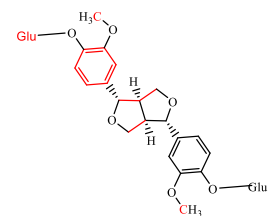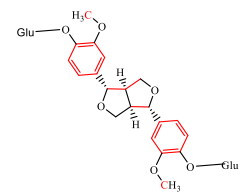

698.19 17

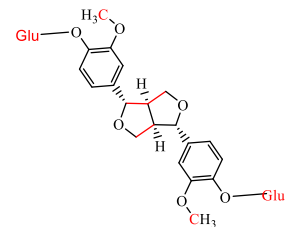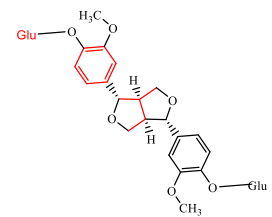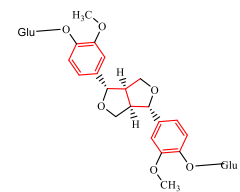

---

699.27 18

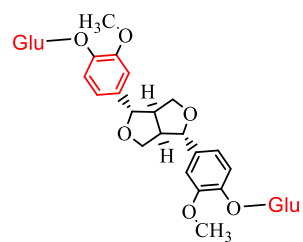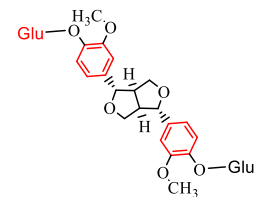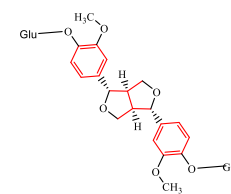

700.27 19

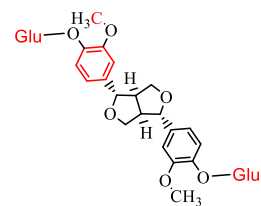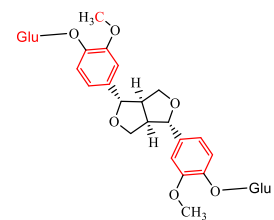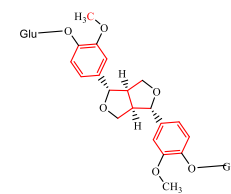

701.29 20

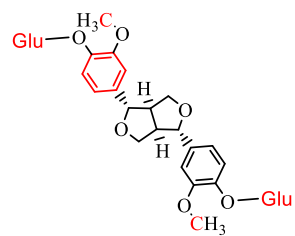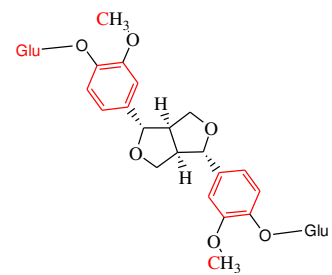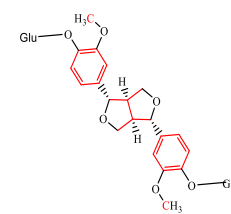

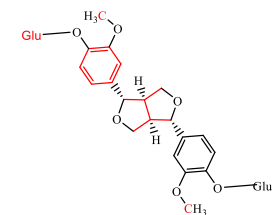

703.25 22

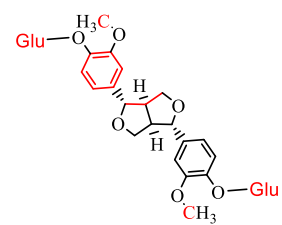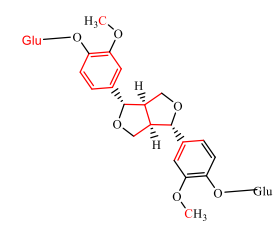

704.23 23

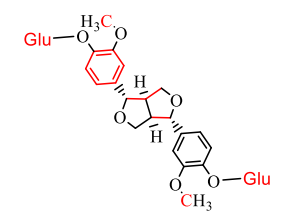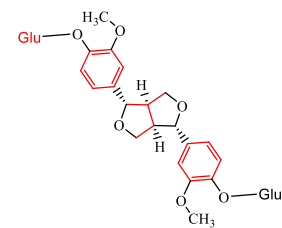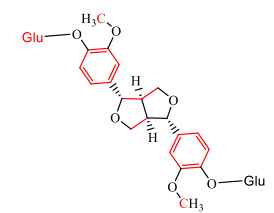

705.26 24

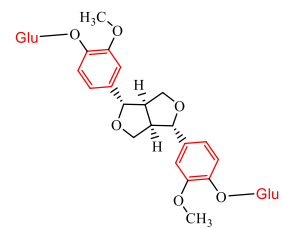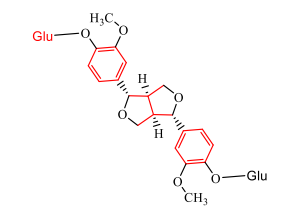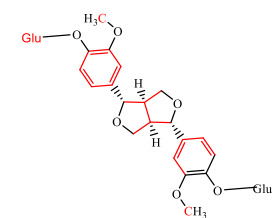

Daughter  
ion  
519.19

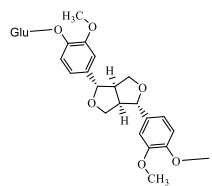

706.25 25

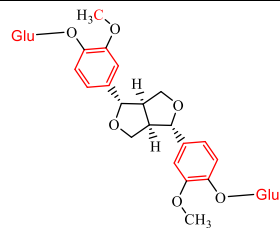

707.26 26

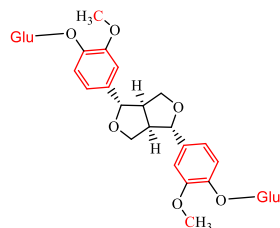

526.30 7

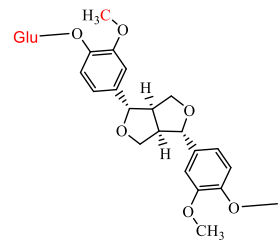

528.25 9

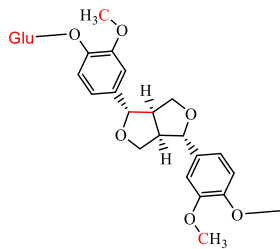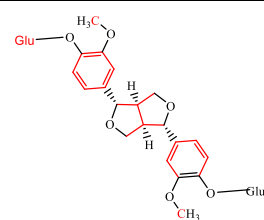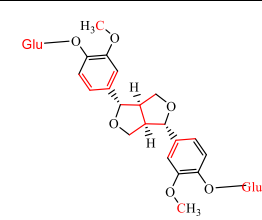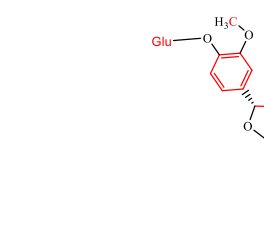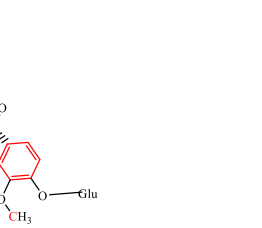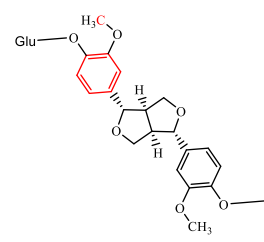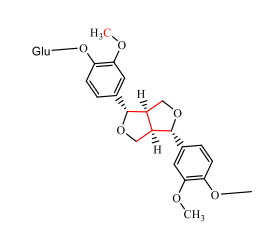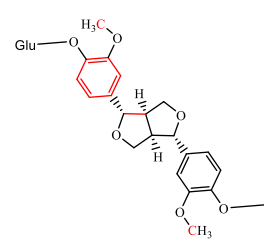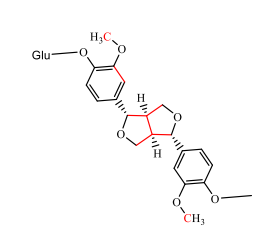

---

529.10 10

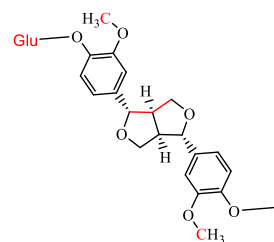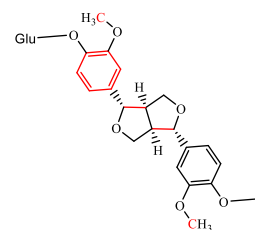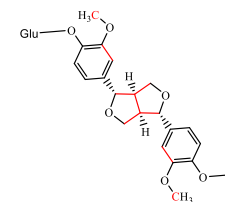

530.17 11

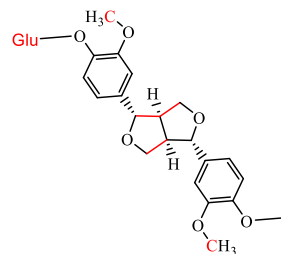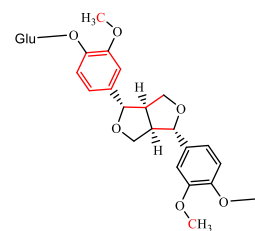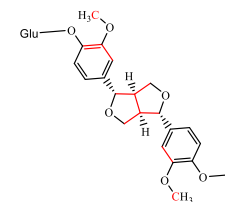

532.25 13

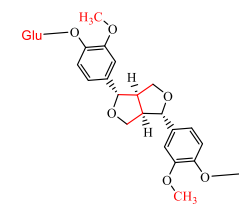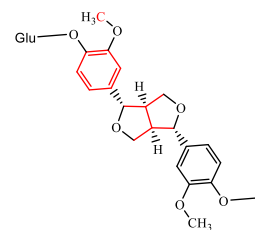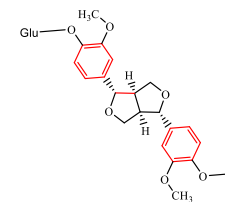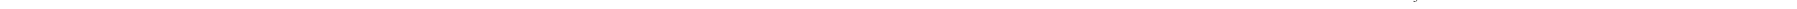

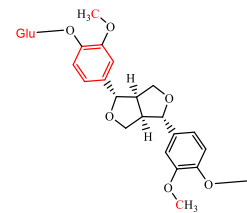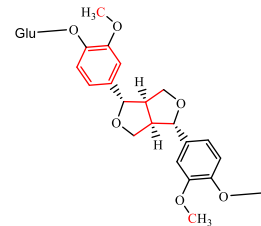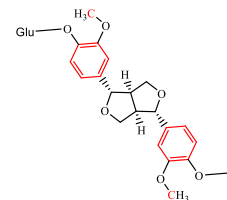

533.22 14

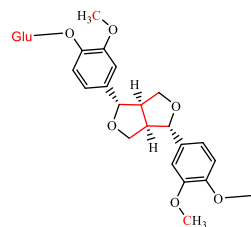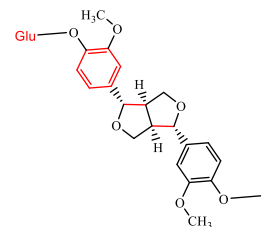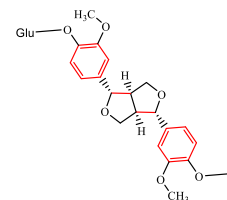

535.26 16

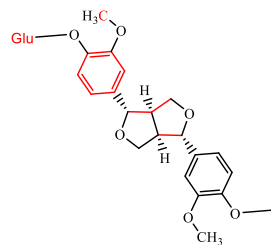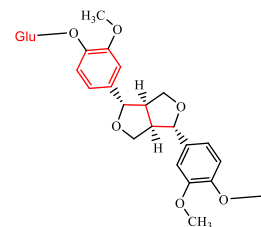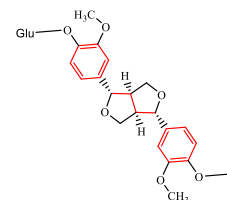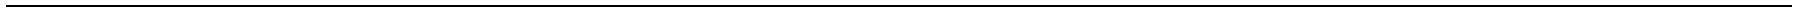

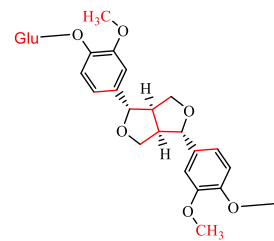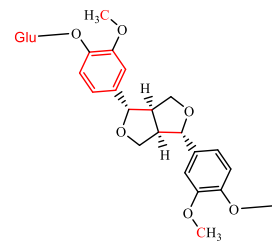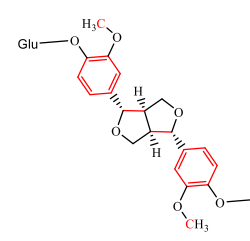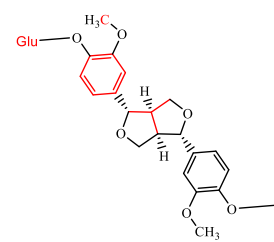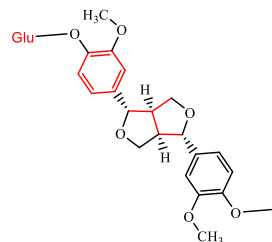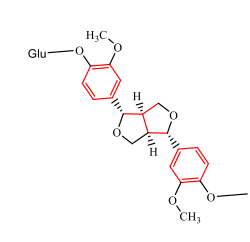

536.26 17

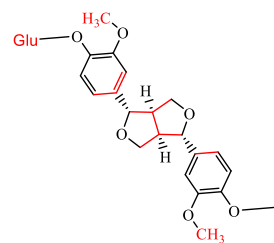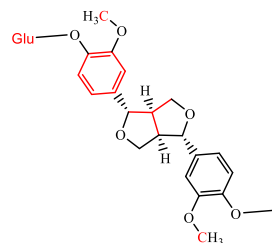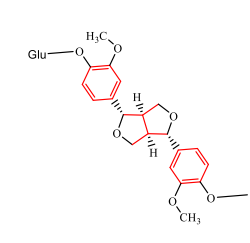

---

537.25 18

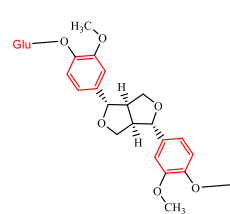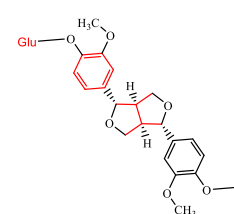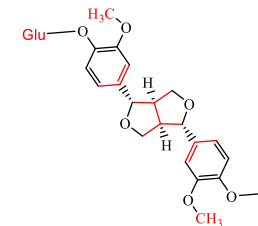

538.24 19

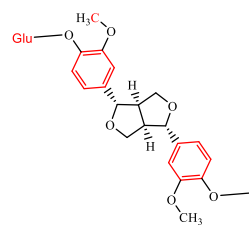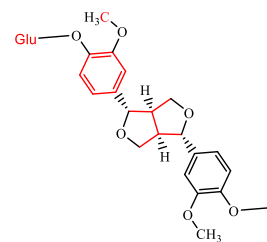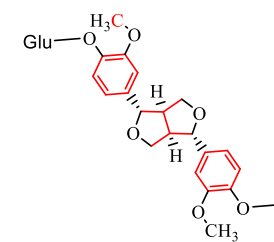

539.25 20

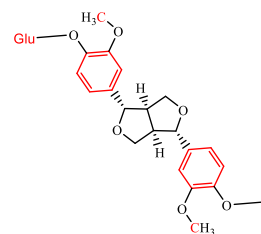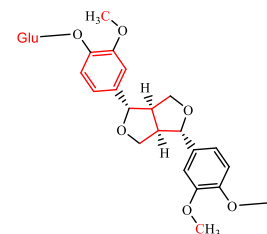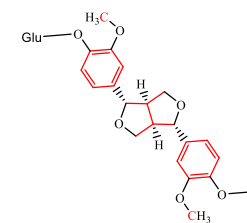



|       |                             |                        |        |    |                                                                                      |                                                                                      |                                                                                      |
|-------|-----------------------------|------------------------|--------|----|--------------------------------------------------------------------------------------|--------------------------------------------------------------------------------------|--------------------------------------------------------------------------------------|
|       |                             |                        | 540.28 | 21 | 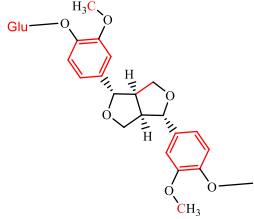  |   |                                                                                      |
| 7.597 | PMG<br>$C_{26}H_{32}O_{11}$ | Major<br>ion<br>519.20 | 520.29 | 1  |   |   |   |
|       |                             |                        | 521.26 | 2  |  |  |  |

---

522.27 3

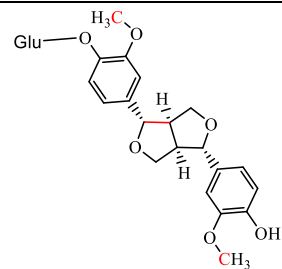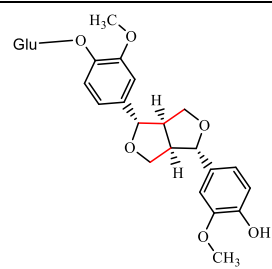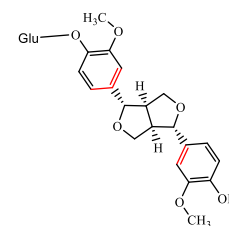

523.29 4

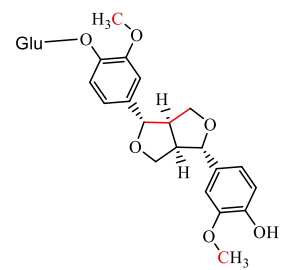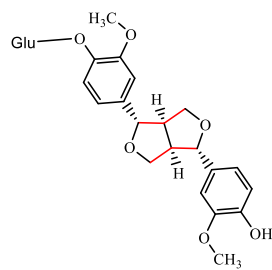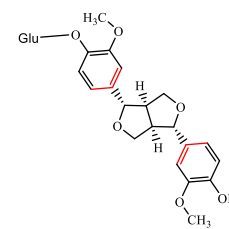

524.29 5

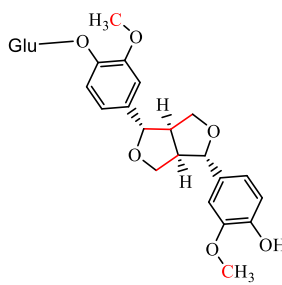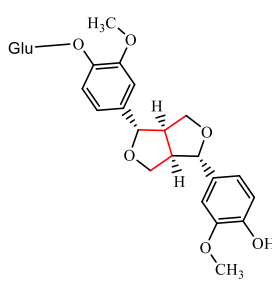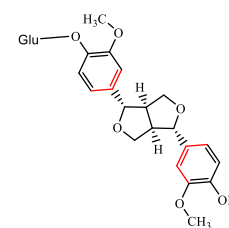

---

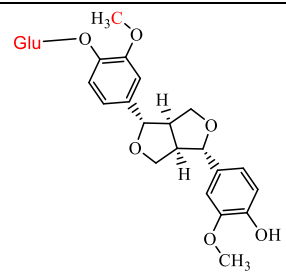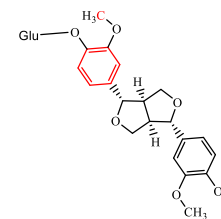

526.29 7

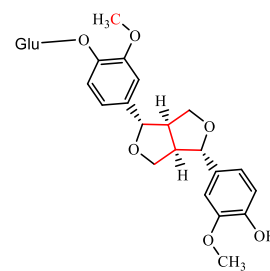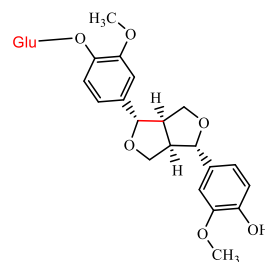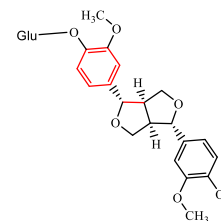

---

527.28 8

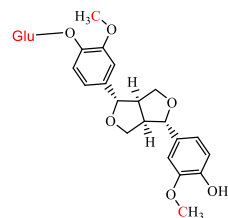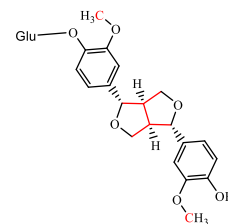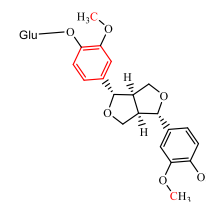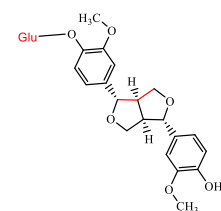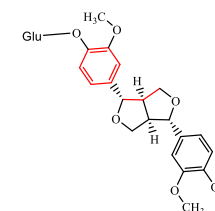

528.28 9

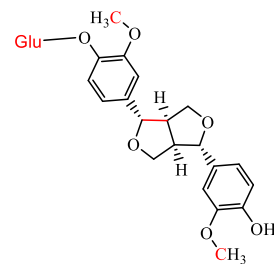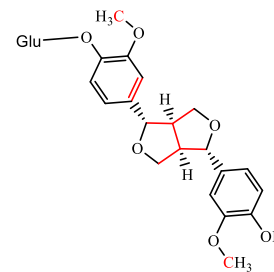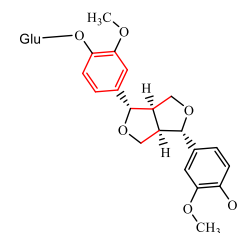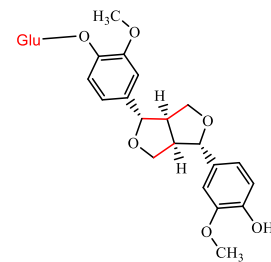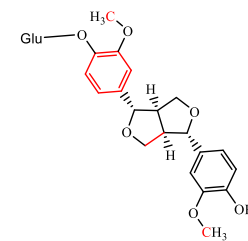

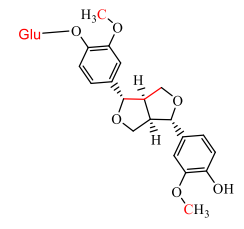

529.32 10

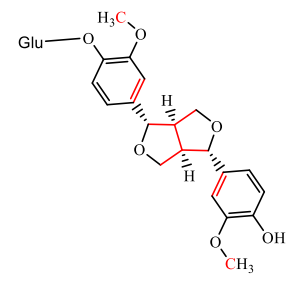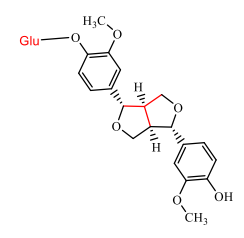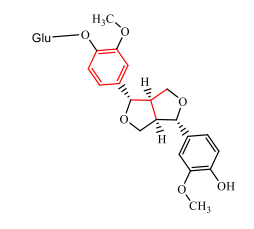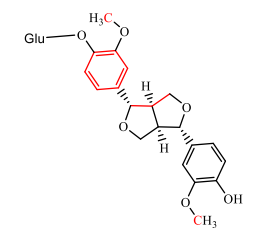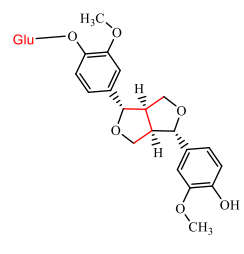

530.31 11

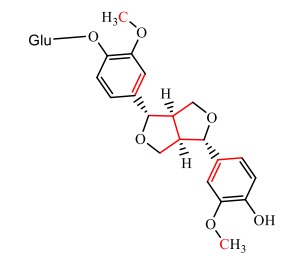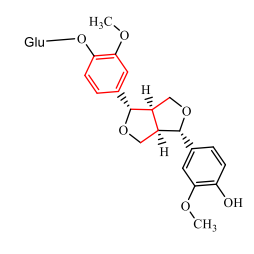



---

537.33 18

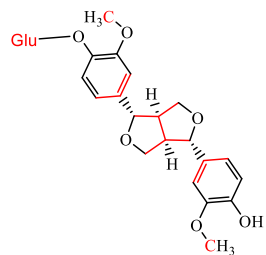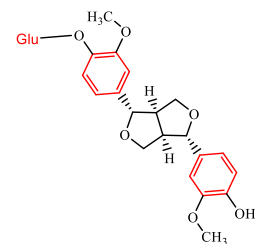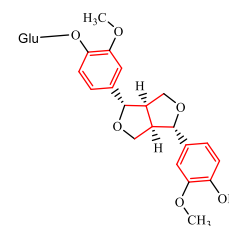

538.29 19

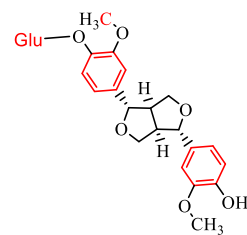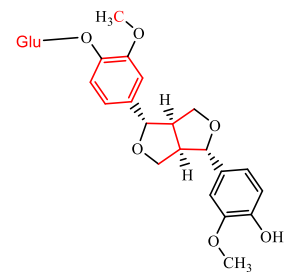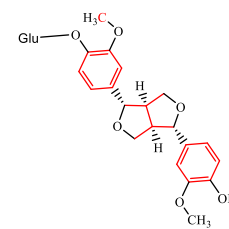

541.31 22

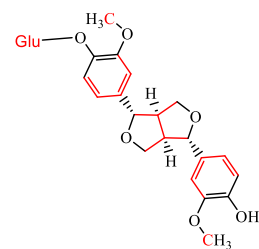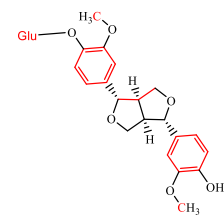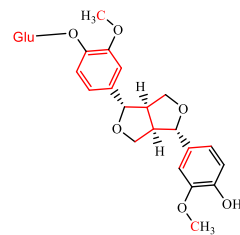

---

Daughter  
ion  
357.13

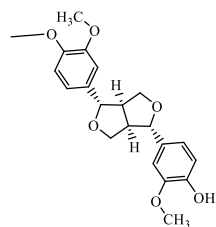

543.32 24

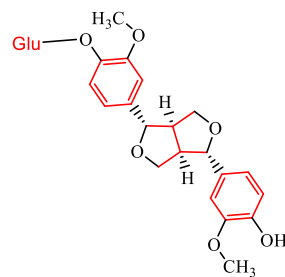

357.28 0

-

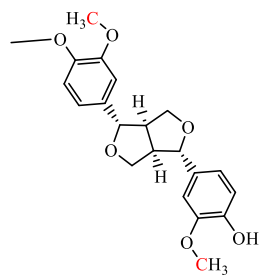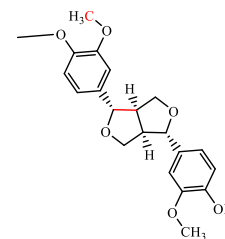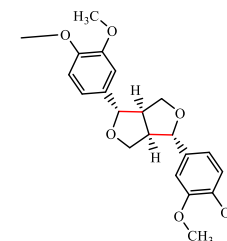

359.23 2

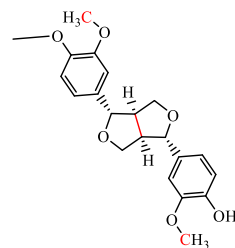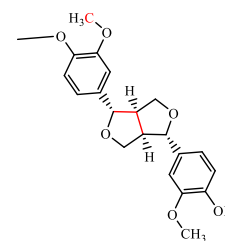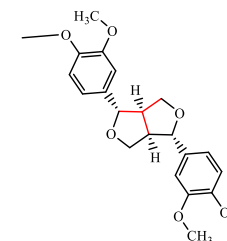

361.16 4



---

362.30 5

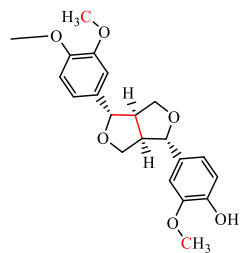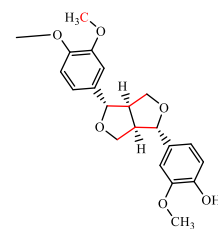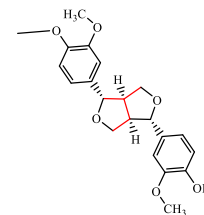

364.30 7

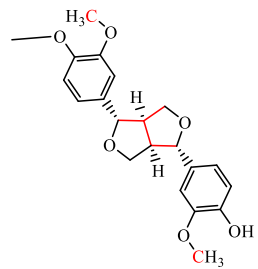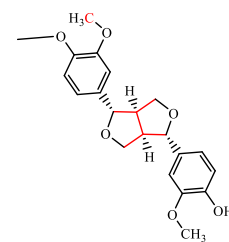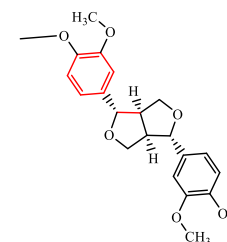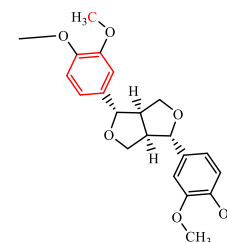

---

365.28 8

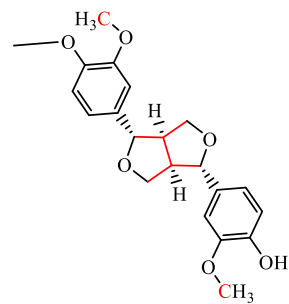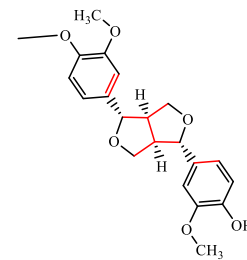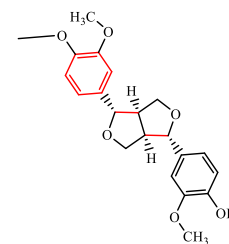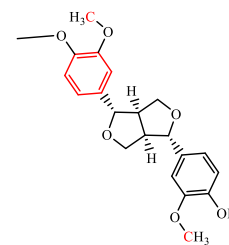

366.28 9

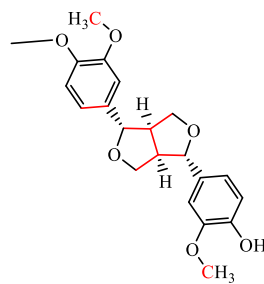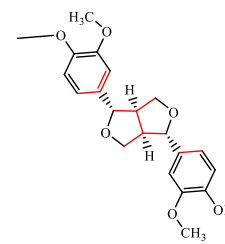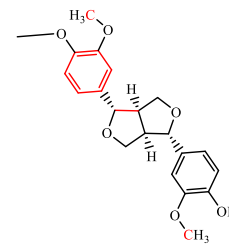

---

367.31 10

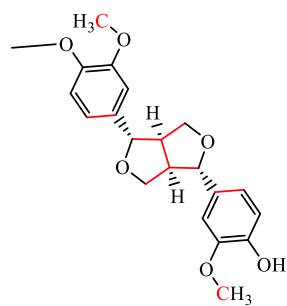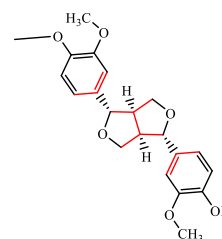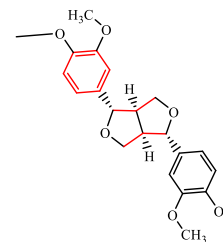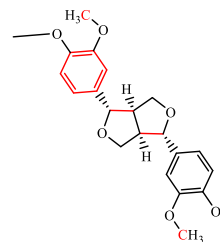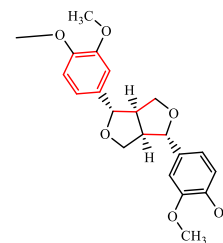

---

368.29 11

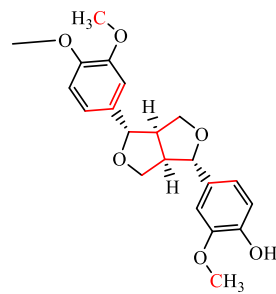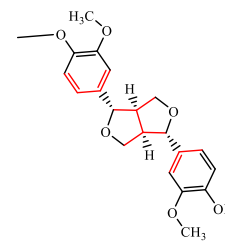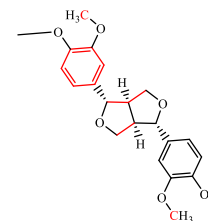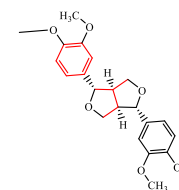

370.25 13

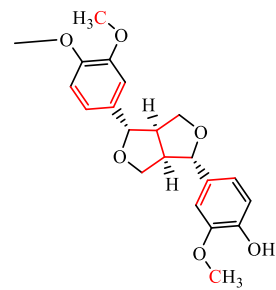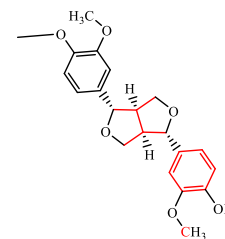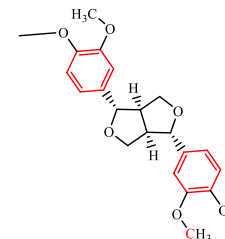

374.32 17

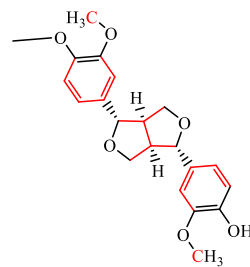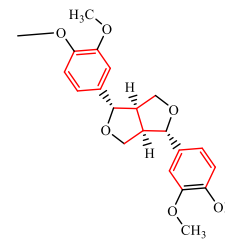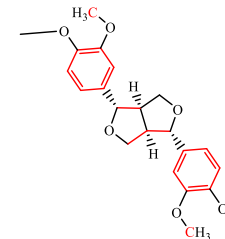

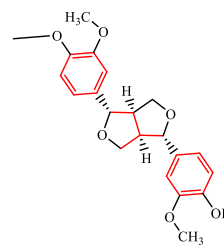

376.30 19

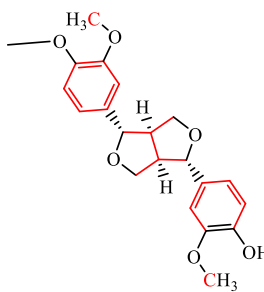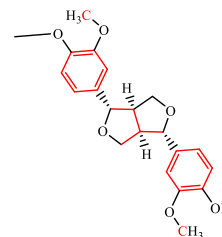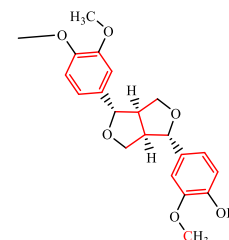

---

9.736

Pin  
 $C_{20}H_{22}O_6$

Major  
ion  
381.1

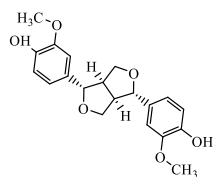

390.2 9

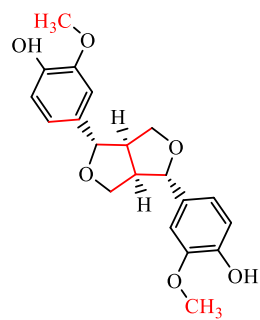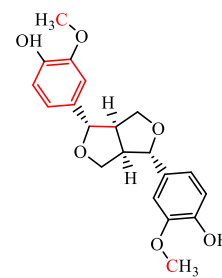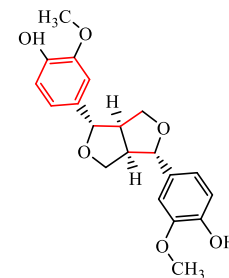

391.2 10

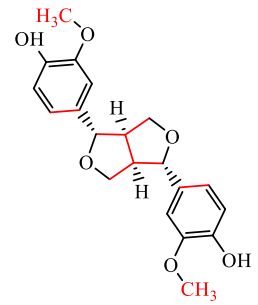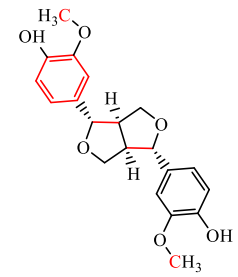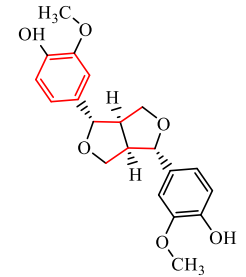

392.2 11

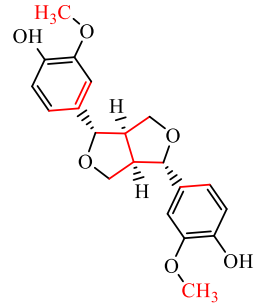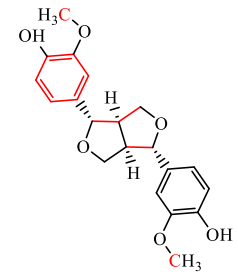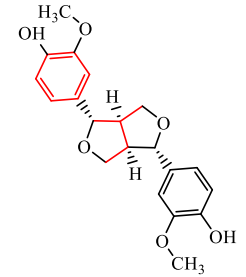

393.2 12

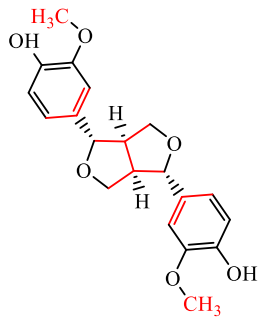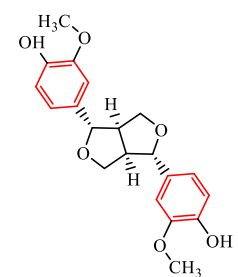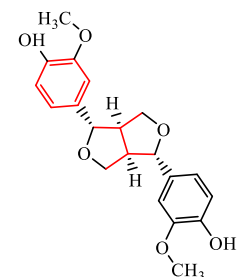

---

394.2 13

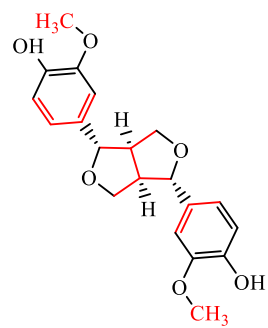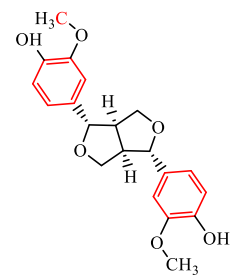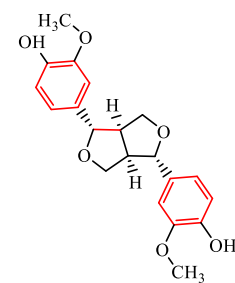

396.2 15

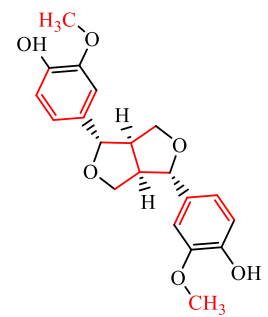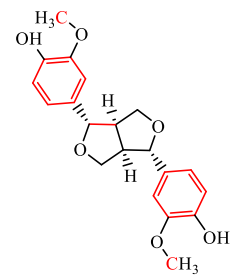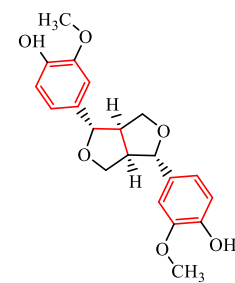

---

397.2 16

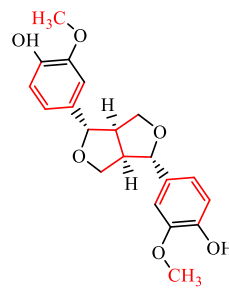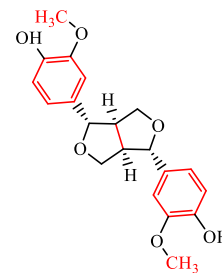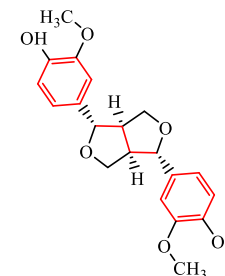

---

The abbreviations in the table mean phenylalanine (Phe), cinnamic acid (Ca), *p*-Coumaric acid (*p*-Co), pinoselin (Pin), pinoselin monoglucoside (PMG) and pinoselin diglucoside (PDG).



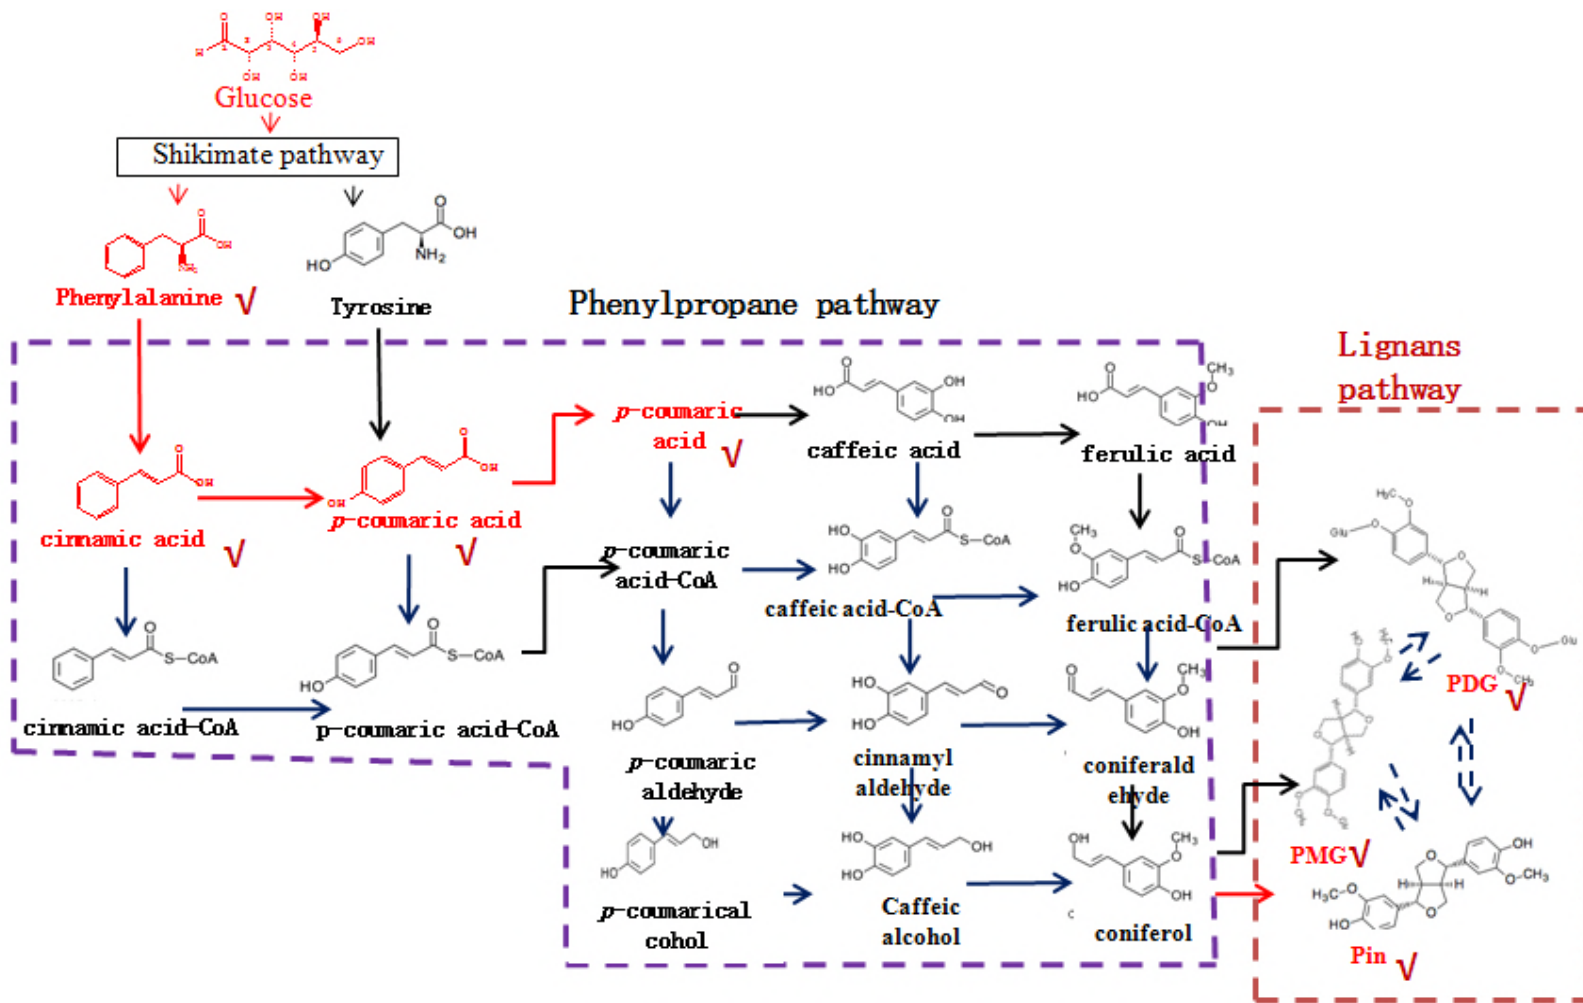

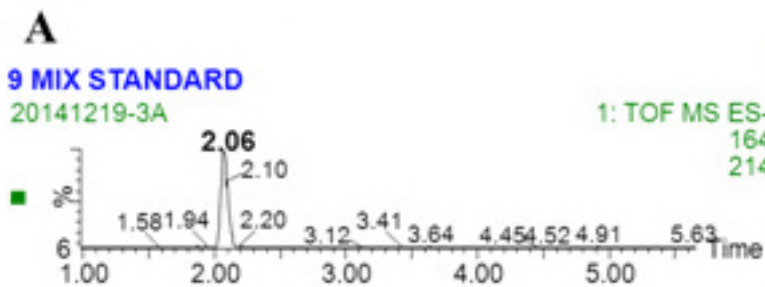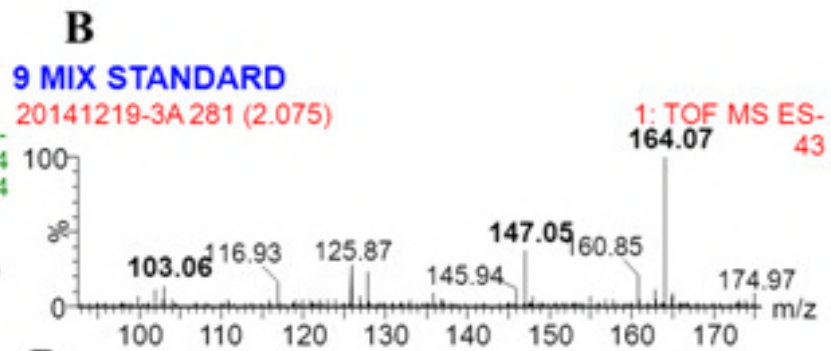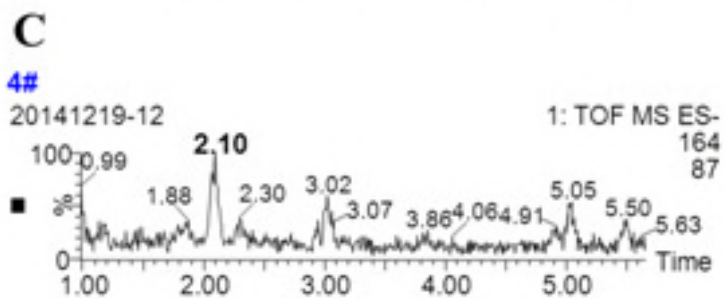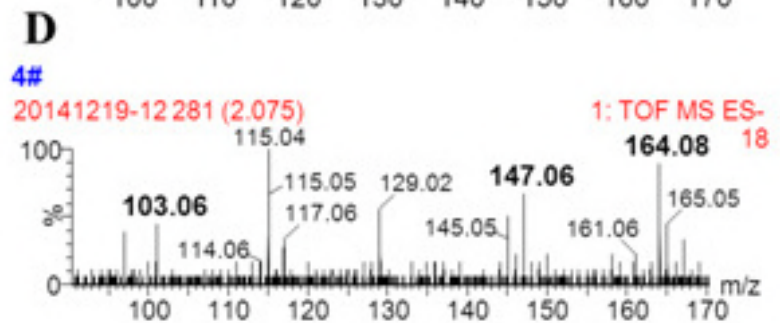

**A****9 MIX STANDARD**

20141219-3A

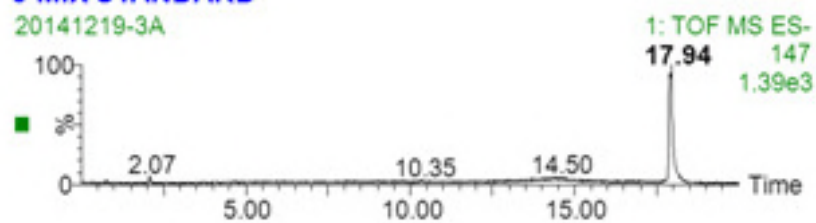**B****9 MIX STANDARD**

20141219-3A 1409 (17.941) Cm (1401:1420-(1346:1386+1432:1510))

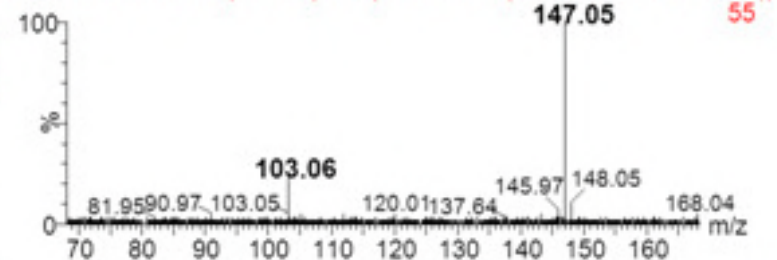**C****4#**

20141219-12

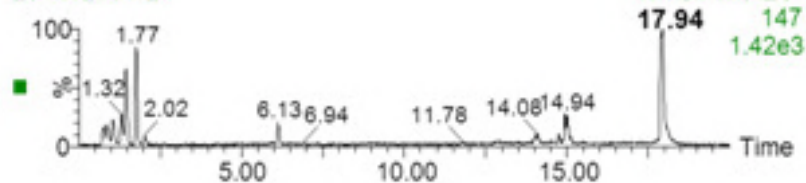**D****4#**

20141219-12 841 (17.943) Cm (822:866-665:783)

1: TOF MS ES- 421

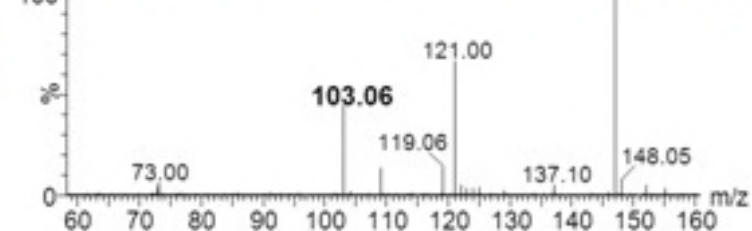

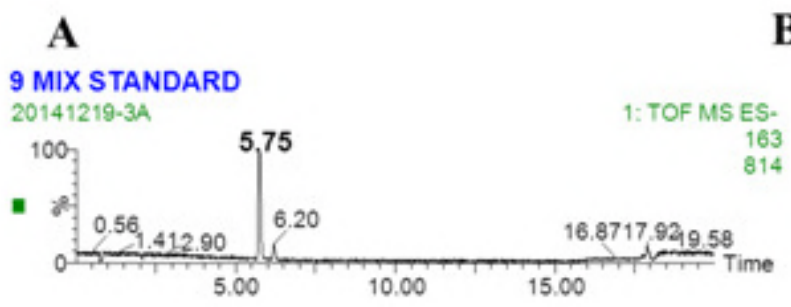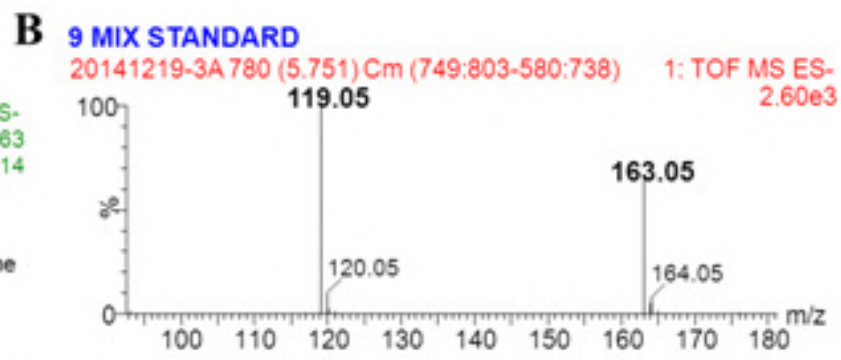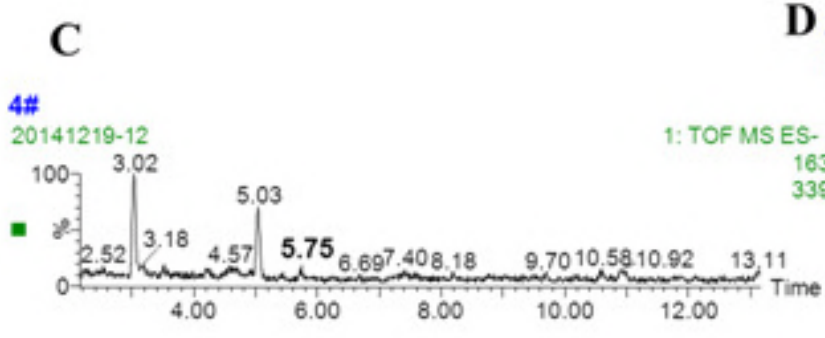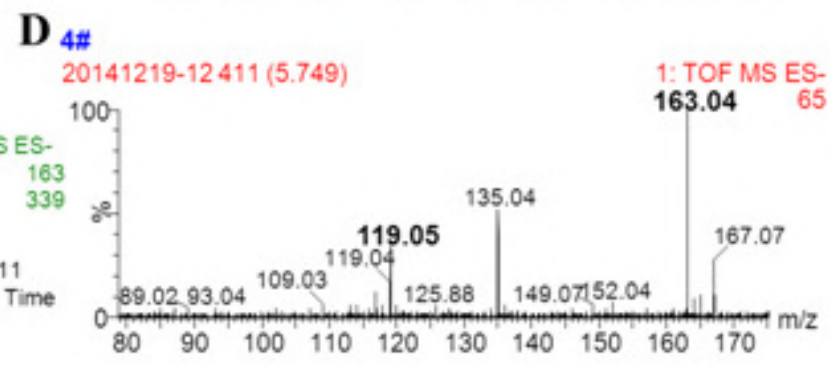

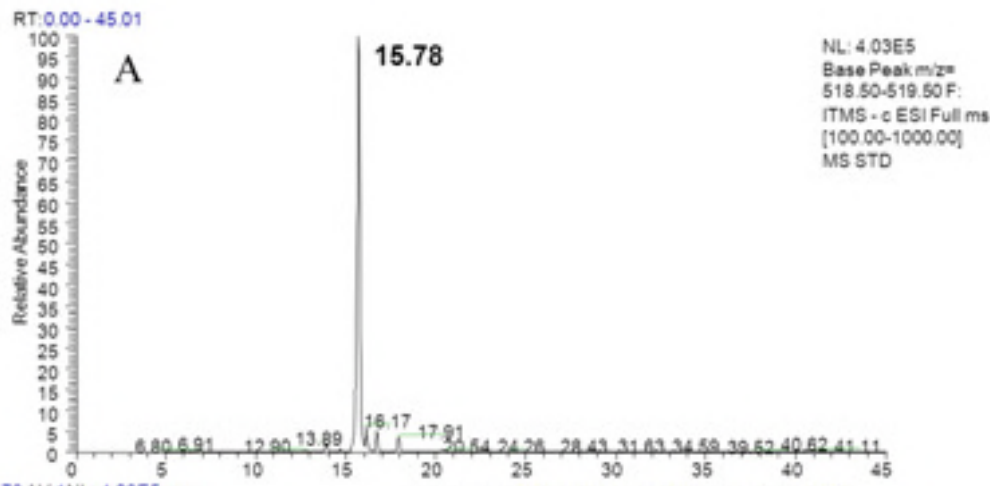

STD# 2426 RT: 15.78 AV: 1 NL: 4.29E5  
F: ITMS - c ESI Full ms [100.00-1000.00]

STD# 2400 RT: 15.79 AV: 1 NL: 2.96E2

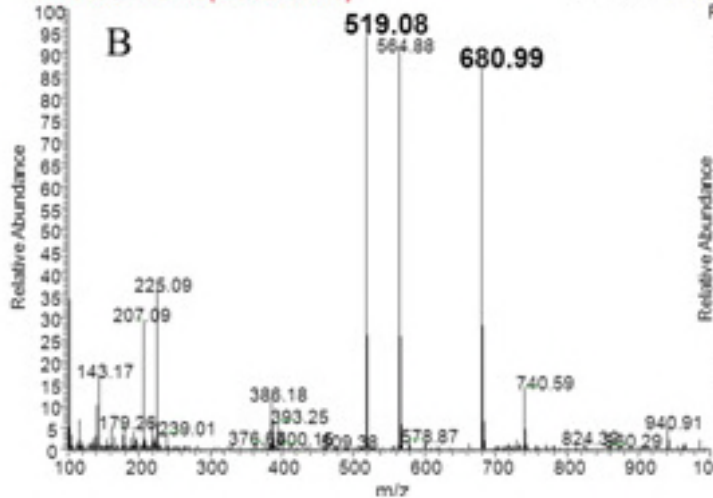

F: ITMS - c ESI Full ms 2 680.60 @cid35.00 [185.00-700.00]

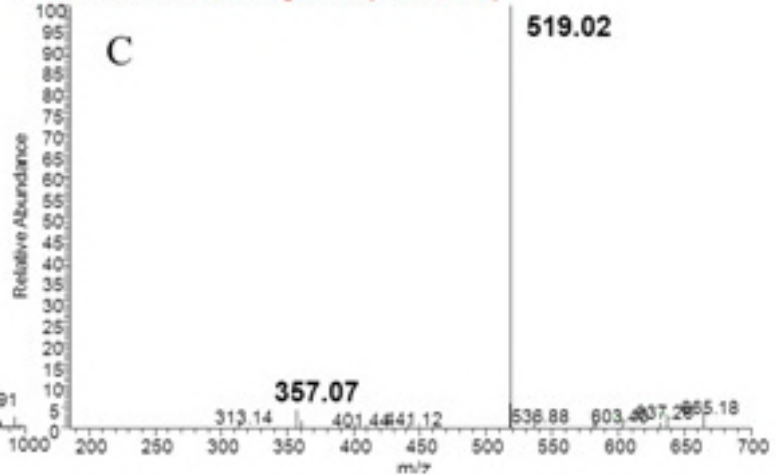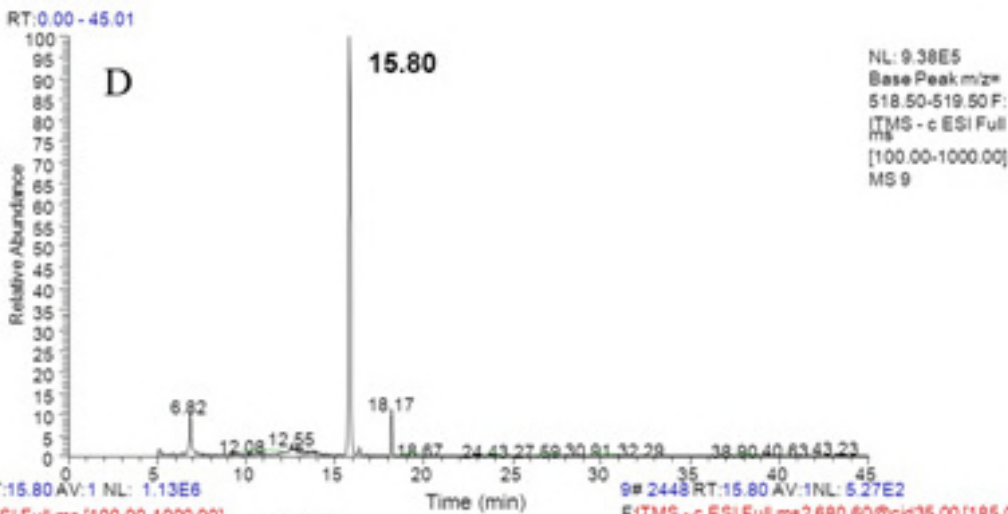

9# 2449 RT: 15.80 AV: 1 NL: 1.13E6  
F: ITMS - c ESI Full ms [100.00-1000.00]

9# 2448 RT: 15.80 AV: 1 NL: 5.27E2  
F: ITMS - c ESI Full ms 2 680.60 @cid35.00 [185.00-700.00]

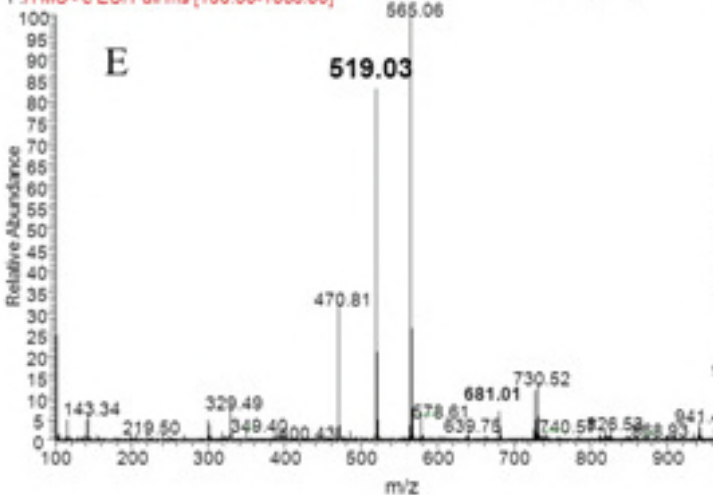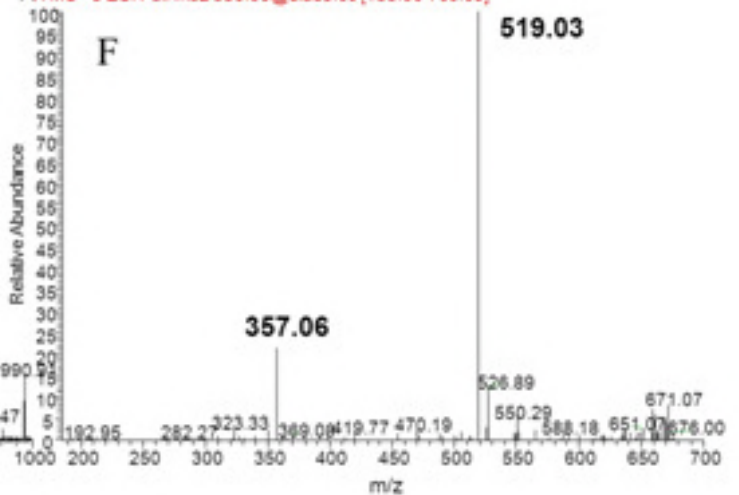

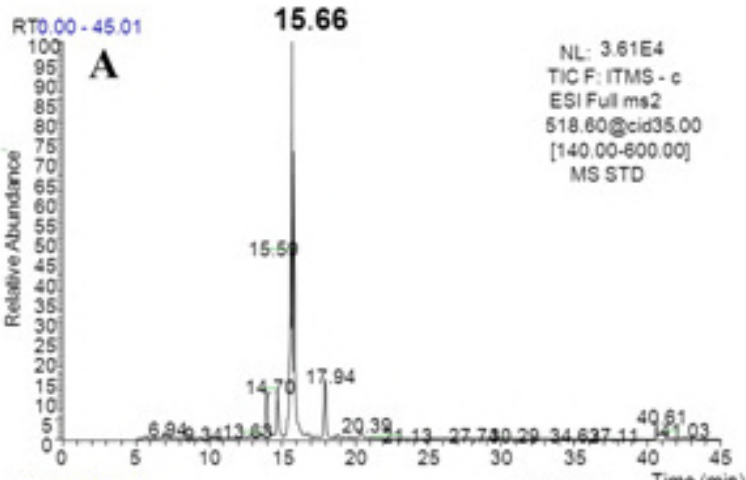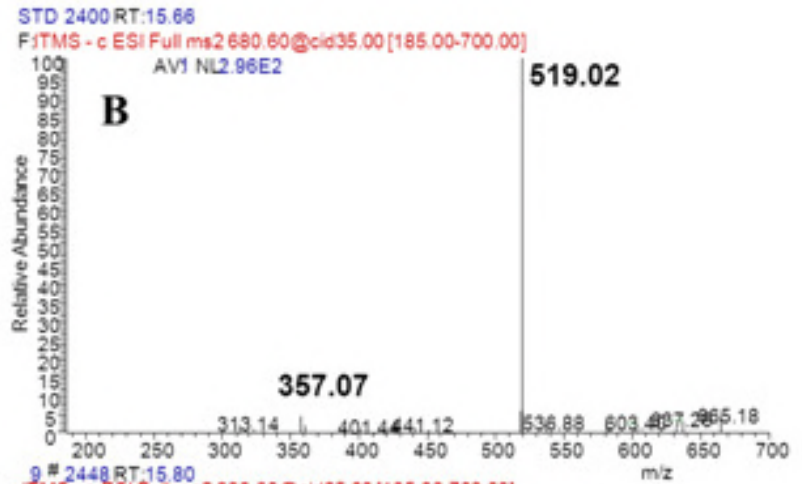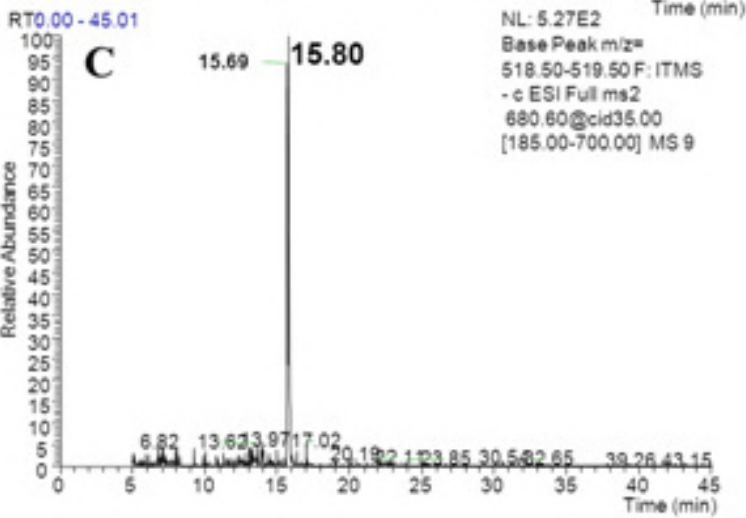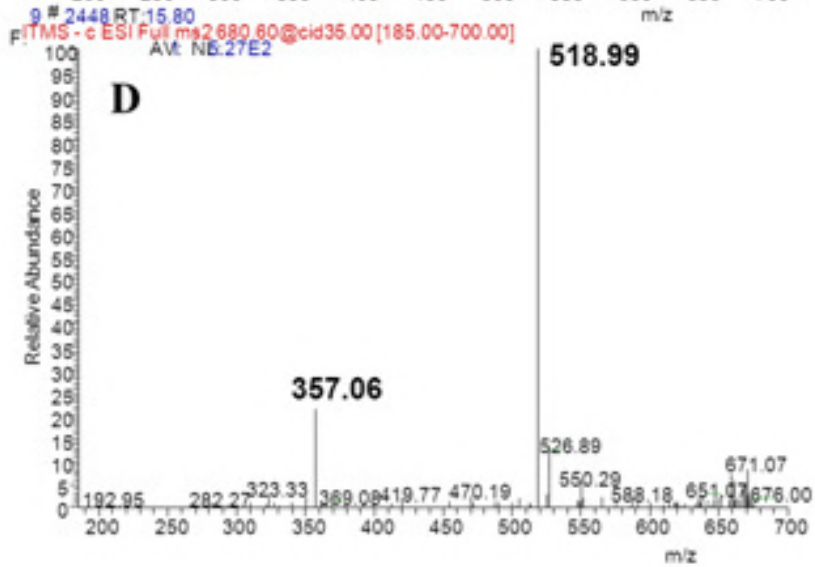



RT: 0.00 - 45.01

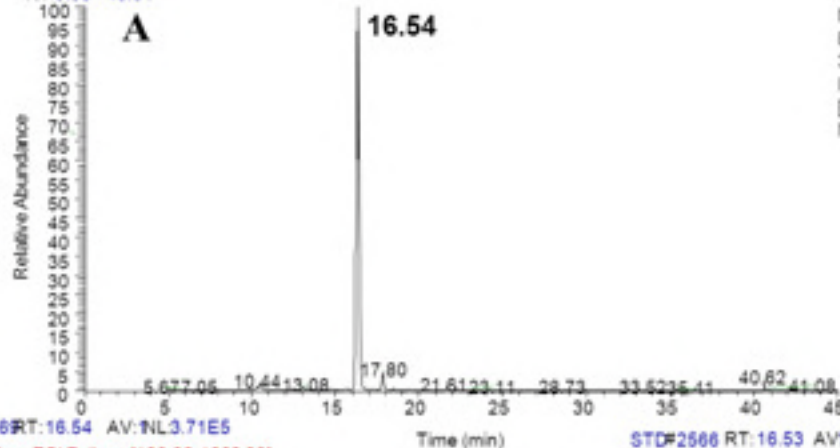

NL: 3.71E5  
 Base Peak m/z:  
 356.50-357.50 F:  
 ITMS - c ESI Full ms  
 [100.00-1000.00]  
 MS STD

STD#2566 RT: 16.54 AV: NL3.71E5

F: ITMS - c ESI Full ms [100.00-1000.00]

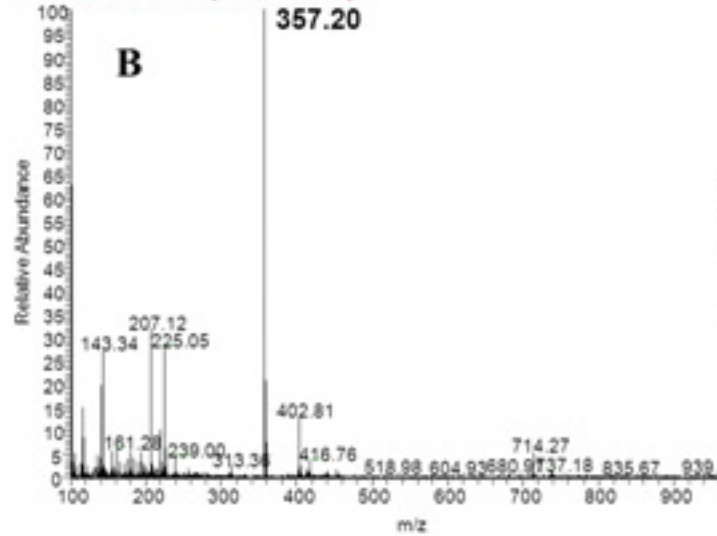

STD#2566 RT: 16.53 AV: NL1.31E5

F: ITMS - c ESI Full ms 2 357.00 @cid35.00 [95.00-400.00]

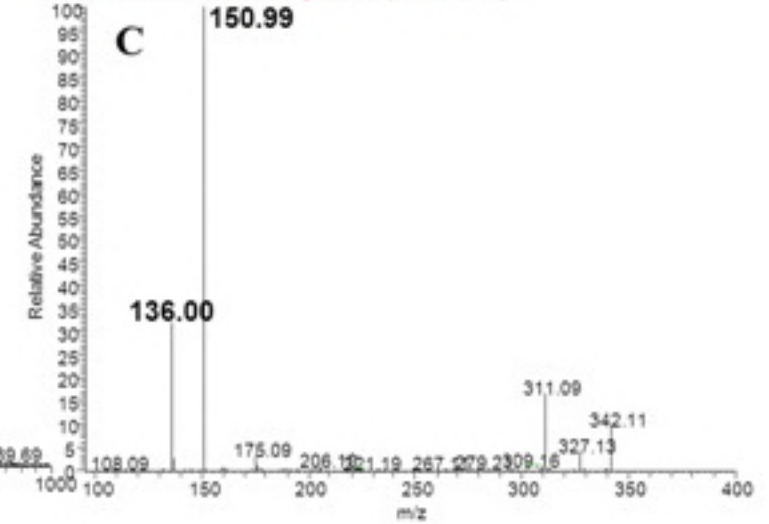

RT: 0.00 - 45.01

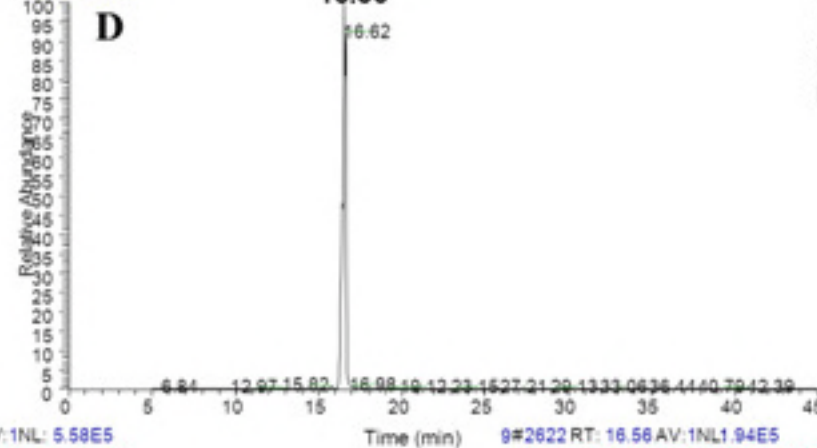

NL: 1.94E5  
 Base Peak m/z:  
 150.50-151.50 F: ITMS  
 - c ESI Full ms 2  
 357.00 @cid35.00  
 [95.00-400.00] MS 9

9# 2625 RT: 16.57 AV: NL 5.58E5

F: ITMS - c ESI Full ms [100.00-1000.00]

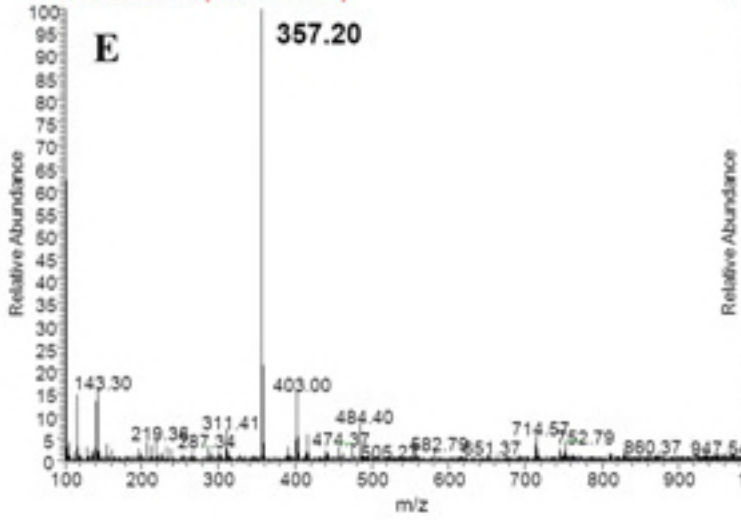

9# 2622 RT: 16.56 AV: NL1.94E5

F: ITMS - c ESI Full ms 2 357.00 @cid35.00 [95.00-400.00]

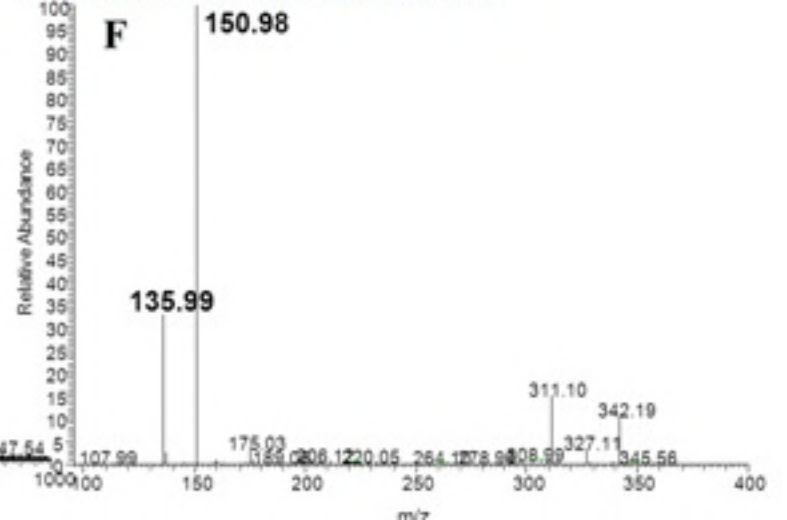

2#-<sup>13</sup>C<sub>6</sub> phenylalanine  
20141219-10 436 (2.061)

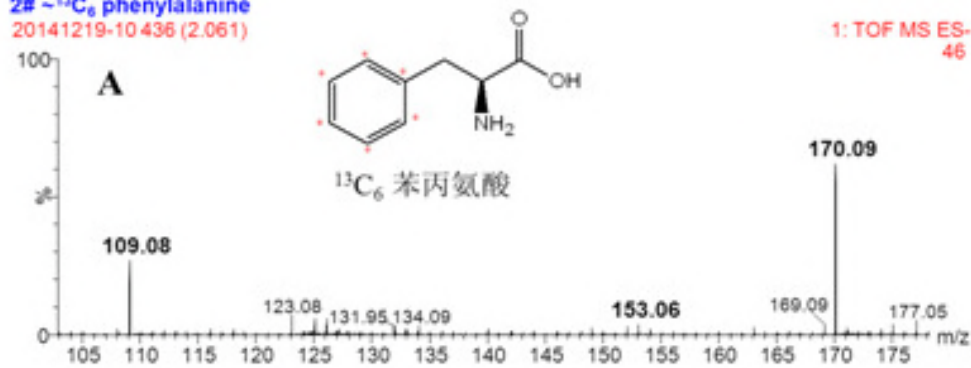

2#-<sup>13</sup>C<sub>6</sub> phenylalanine  
20141219-10 838 (17.941)

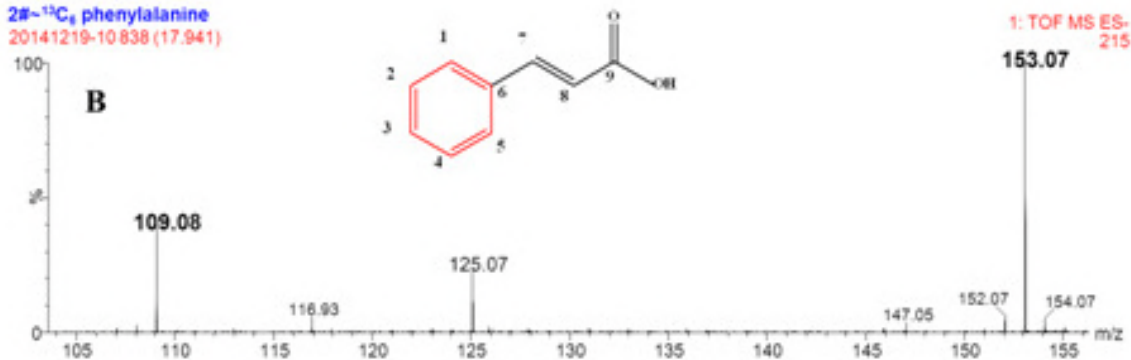

2#-<sup>13</sup>C<sub>6</sub> phenylalanine  
20141219-10 411 (5.749)

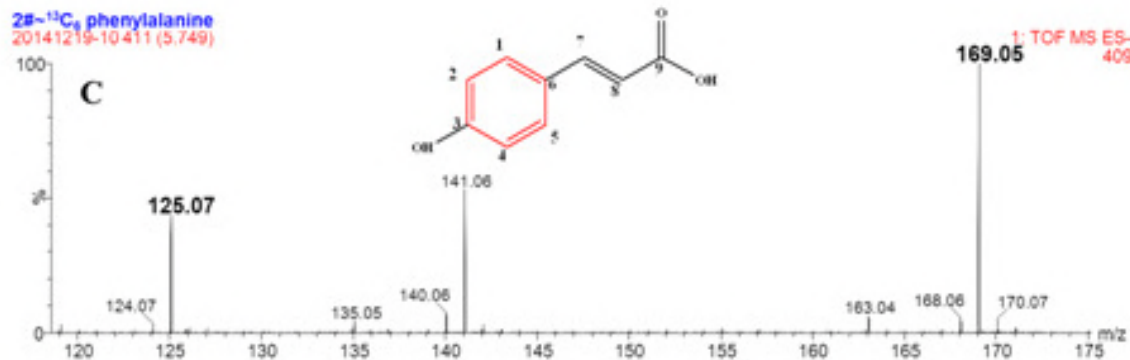

2#-<sup>13</sup>C<sub>6</sub> phenylalanine  
20141219-10 672 (9.737)

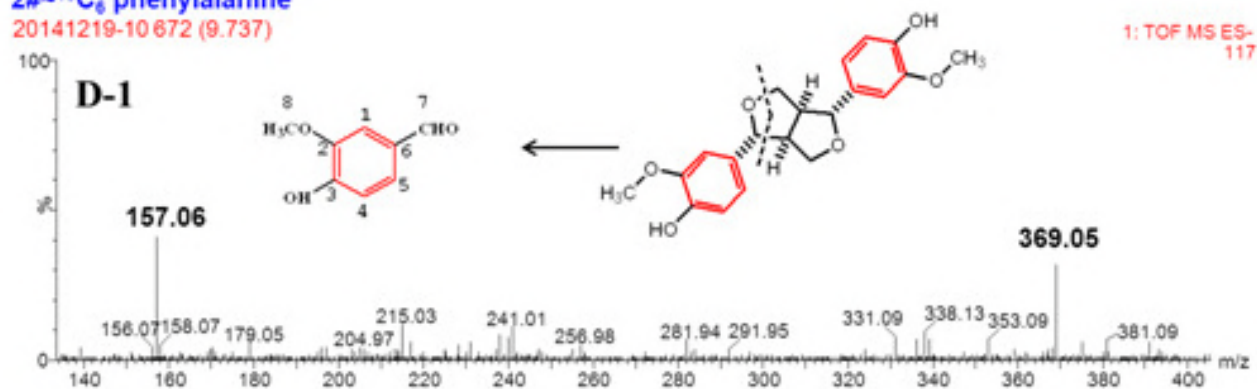

9 MIX STANDARD  
20141219-3A 1032 (9.736)

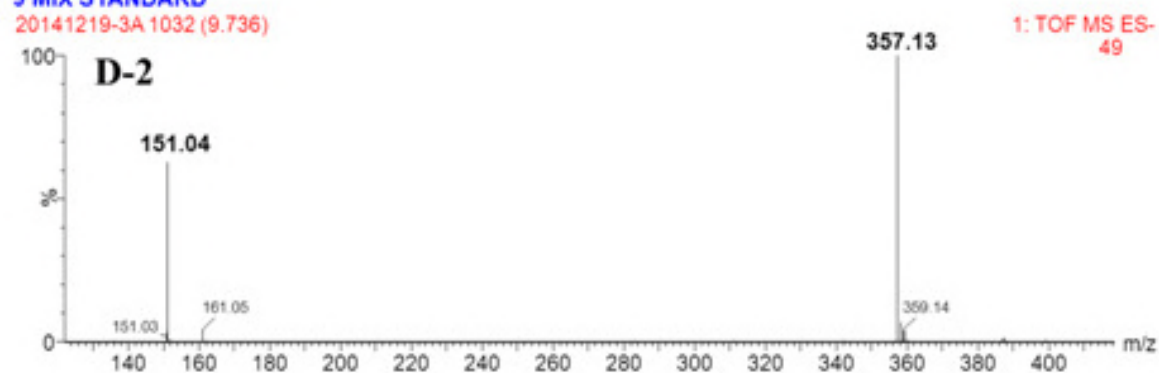



**1# <sup>13</sup>C<sub>6</sub> glucose**

20141219-9 659 (2.061)

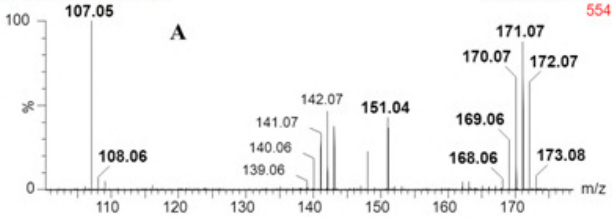

**1# <sup>13</sup>C<sub>6</sub> glucose**

20141219-9 276 (17.943)

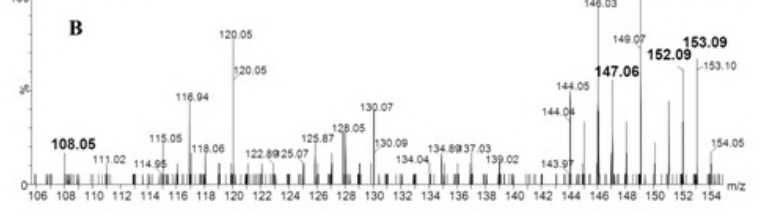

**1# <sup>13</sup>C<sub>6</sub> glucose**

20141219-9 681 (5.749)

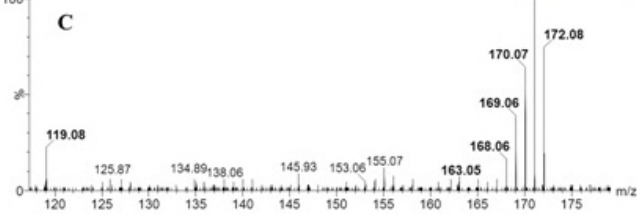

**1# <sup>13</sup>C<sub>6</sub> glucose**

20141219-9 2002 (7.592)

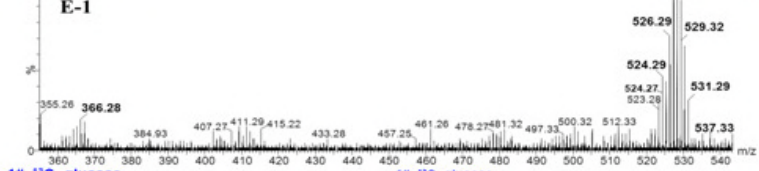

**1# <sup>13</sup>C<sub>6</sub> glucose**

20141219-9 1135 (5.869)

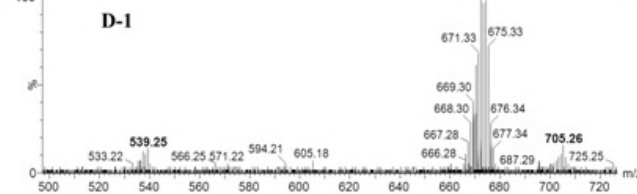

**1# <sup>13</sup>C<sub>6</sub> glucose**

20141219-9 2002 (7.592)

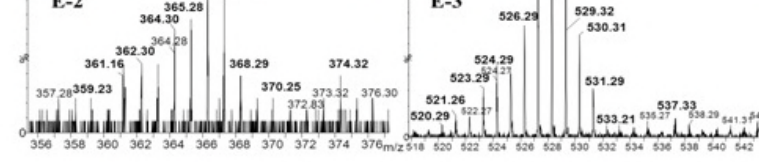

**1# <sup>13</sup>C<sub>6</sub> glucose**

20141219-9 1135 (5.869)

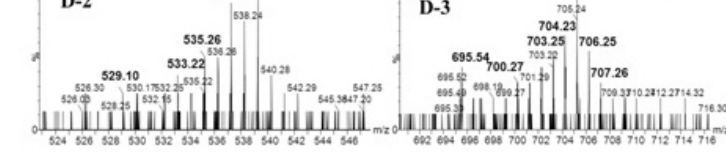

**1# <sup>13</sup>C<sub>6</sub> glucose**

20141219-9 1135 (5.869)

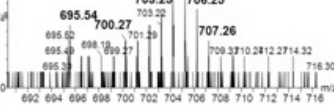

**9 MIX STANDARD**

20141219-3A 1033 (7.592)

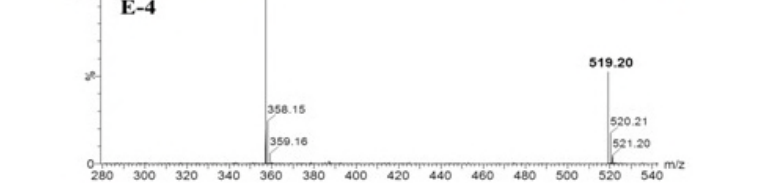

**9 MIX STANDARD**

20141219-3A 798 (5.868)

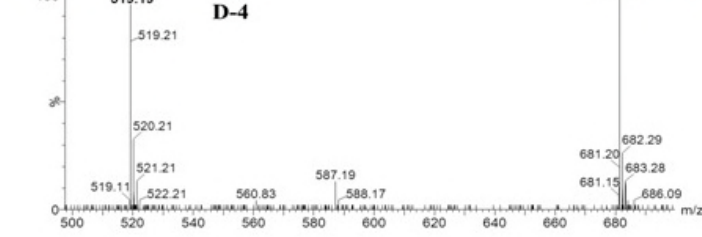

**1# <sup>13</sup>C<sub>6</sub> glucose**

20141219-5 1337 (9.737)

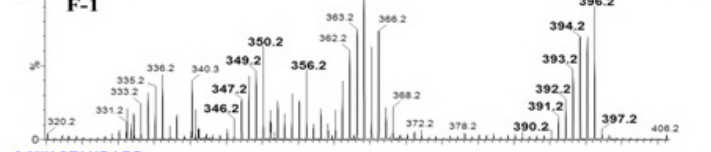

**9 MIX STANDARD**

20141219-4 1326 (9.736)

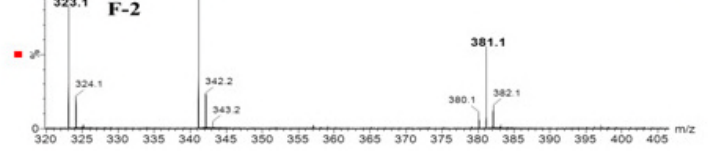

# Evidence for:

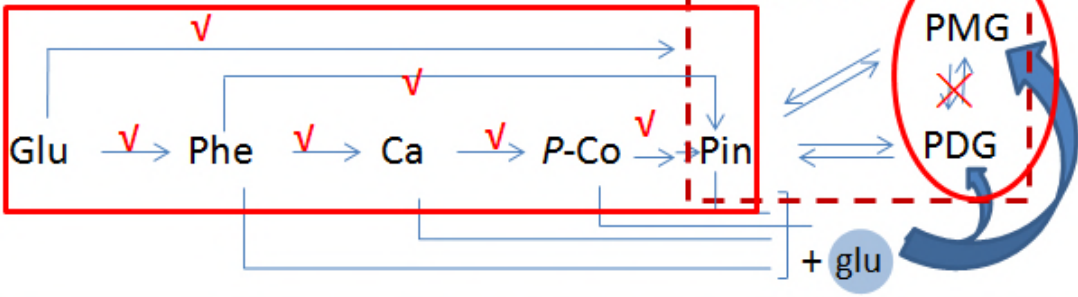

# Evidence for:

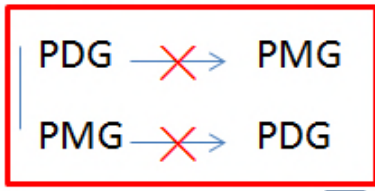

**A**

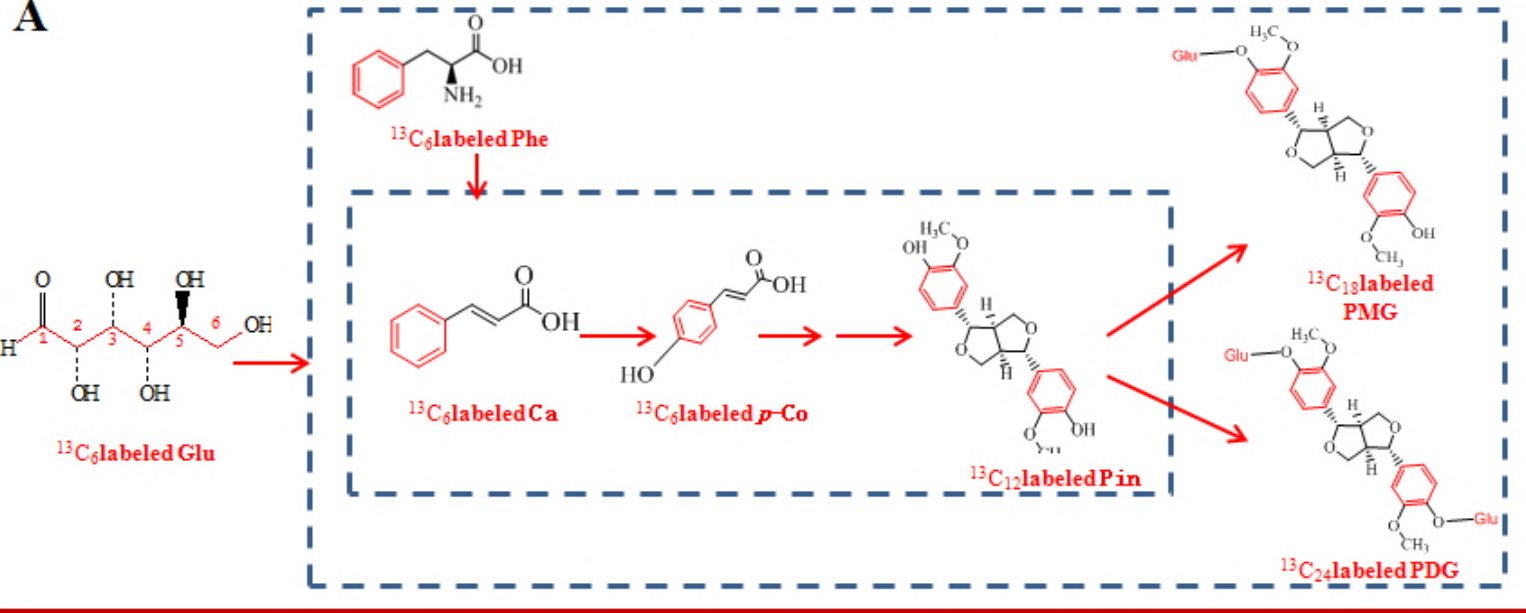

**B**

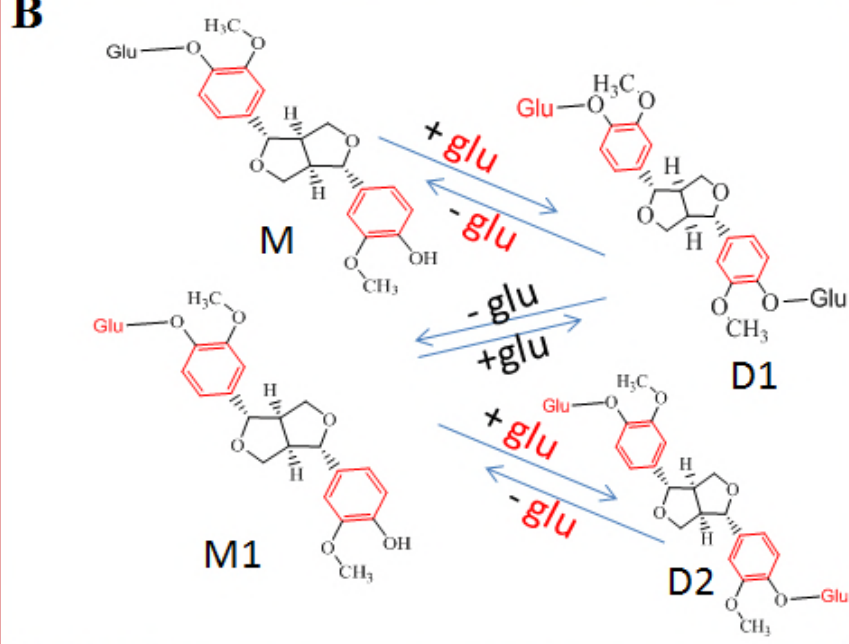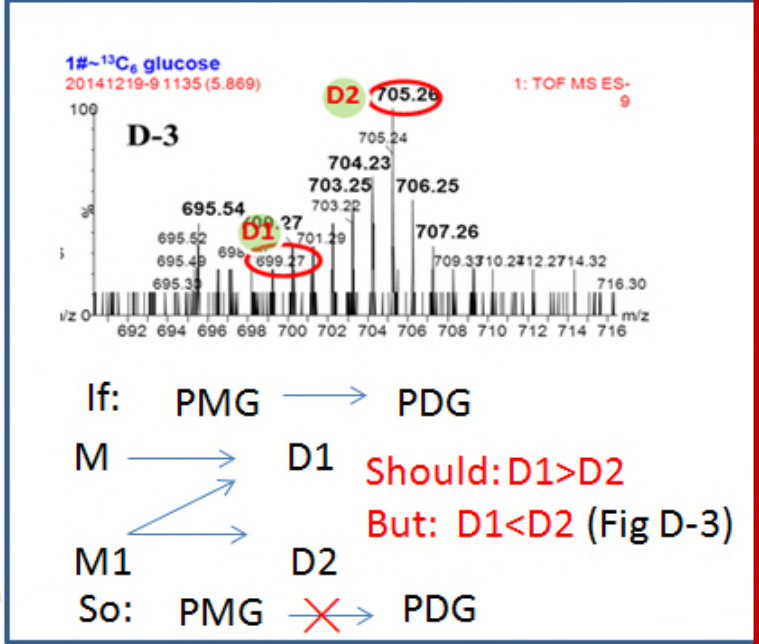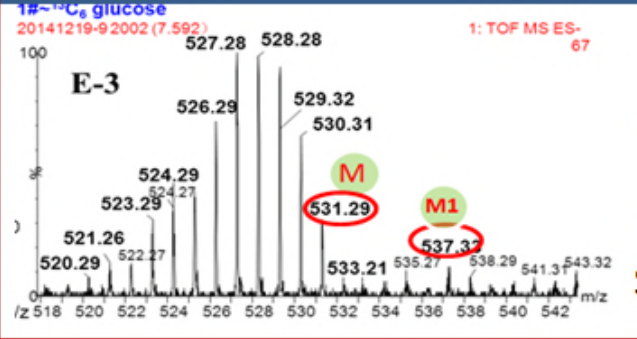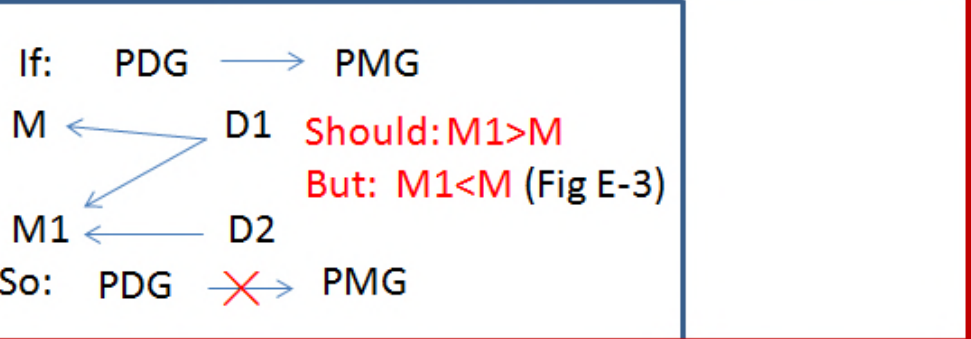

Source: http://biorxiv.org/content/10.1101/354605v1.full.pdf
